1           ***SNTA1 Gene Rescues Ion Channel Function in Cardiomyocytes***  
2           ***Derived from Induced Pluripotent Stem Cells Reprogrammed from***  
3           ***Muscular Dystrophy Patients with Arrhythmias***

4  
5 Eric N Jimenez-Vazquez, PhD<sup>1</sup>, Michael Arad, MD<sup>4</sup>, Álvaro Macías, PhD<sup>2</sup>, Maria  
6 Linarejos Vera-Pedrosa, MS<sup>2</sup>, Francisco M. Cruz-Uréndez, PhD,<sup>2</sup> Ashley J Cuttitta, MS<sup>3</sup>,  
7 André Monteiro Da Rocha, PhD<sup>1</sup>, Todd J Herron PhD<sup>1</sup>, Daniela Ponce-Balbuena, PhD<sup>1</sup>,  
8 Guadalupe Guerrero-Serna, PhD<sup>1</sup>, Ofer Binah, PhD<sup>5</sup>, Daniel E Michele PhD<sup>3</sup>, and José  
9 Jalife, MD, PhD,<sup>1,2,3\*</sup>.

10  
11 <sup>1</sup>Department of Internal Medicine and Molecular and Integrative Physiology, Center for  
12 Arrhythmia Research, University of Michigan, Ann Arbor, MI, USA.

13 <sup>2</sup>Centro Nacional de Investigaciones Cardiovasculares (CNIC) Carlos III, Madrid, Spain,  
14 and Centro de Investigación Biomédica en Red de Enfermedades Cardiovasculares  
15 (CIBERCV), Madrid, Spain

16 <sup>3</sup>Department of Molecular and Integrative Physiology, University of Michigan Medical  
17 School, Ann Arbor, MI, USA.

18 <sup>4</sup>Leviev Heart Center, Sheba Medical Center, Tel Hashomer, and Tel Aviv University,  
19 Israel.

20 <sup>5</sup>Department of Physiology, Biophysics and Systems Biology, Ruth and Bruce Rappaport  
21 Faculty of Medicine, Technion - Israel Institute of Technology, Haifa, Israel.

22

23 **Running Title:** *SNTA1 Rescues the Na<sub>v</sub>1.5-Kir2.1 Channelosome in DMD*

24

25 \*Correspondence to José Jalife, MD, PhD: Centro Nacional de Investigaciones  
26 Cardiovasculares (CNIC) Carlos III, Melchor Fernández Almagro 3, 28029, Madrid,  
27 SPAIN; Phone: +34 914531200 Ext. 1512; Email: [jjalife@cnic.es](mailto:jjalife@cnic.es).

28

29

30 **Abstract**

31

32 Patients with cardiomyopathy of Duchenne Muscular Dystrophy (DMD) are at risk of  
33 developing life-threatening arrhythmias, but the mechanisms are unknown. We aimed to  
34 determine the role of cardiac ion channels controlling cardiac excitability in the  
35 mechanisms of arrhythmias in DMD patients. To test whether cardiac dystrophin  
36 mutations lead to defective Nav1.5–Kir2.1 channelosomes and arrhythmias, we  
37 generated iPSC-CMs from two hemizygous DMD males, a heterozygous female, and two  
38 unrelated controls. Two Patients had abnormal ECGs with frequent runs of ventricular  
39 tachycardia. iPSC-CMs from all DMD patients showed abnormal action potential profiles,  
40 slowed conduction velocities, and reduced sodium ( $I_{Na}$ ) and inward rectifier potassium  
41 ( $I_{K1}$ ) currents. Membrane Nav1.5 and Kir2.1 protein levels were reduced in hemizygous  
42 DMD iPSC-CMs but not in heterozygous iPSC-CMs. Remarkably, transfecting just one  
43 component of the dystrophin protein complex ( $\alpha$ 1-syntrophin) in hemizygous iPSC-CMs  
44 restored channelosome function,  $I_{Na}$  and  $I_{K1}$  densities and action potential profile. We  
45 provide the first demonstration that iPSC-CMs reprogrammed from skin fibroblasts of  
46 DMD patients with cardiomyopathy have a dysfunction of the Nav1.5-Kir2.1  
47 channelosome, with consequent reduction of cardiac excitability and conduction.  
48 Altogether, iPSC-CMs from patients with DMD cardiomyopathy have a Nav1.5-Kir2.1  
49 channelosome dysfunction, which can be rescued by the scaffolding protein  $\alpha$ 1-  
50 syntrophin to restore excitability.

51

52 **Keywords**

53

54 Dystrophin-associated protein complex, Nav1.5-Kir2.1 channelosome, patient-specific  
55 hiPSC-CMs, arrhythmias, sudden cardiac death

56 **1. Introduction**

57

58 Null mutations in the Dp427 isoform of the dystrophin gene result Duchenne Muscular  
59 Dystrophy (DMD).<sup>1</sup> This inheritable X-linked disease affects primarily adolescent males  
60 causing progressive skeletal muscle deterioration, with negative effects in the central  
61 nervous system.<sup>2</sup> Muscular dystrophies are also characterized by cardiac muscle  
62 involvement,<sup>3</sup> which usually starts with an abnormal ECG.<sup>4</sup> Eventually, most patients with  
63 DMD will develop cardiomyopathy by 20 years of age.<sup>5</sup> Many will be at a high risk for  
64 arrhythmia and sudden cardiac death (SCD), which contributes considerably to the  
65 morbidity and mortality of the disease.<sup>6</sup> However, diagnosis and prevention of arrhythmia  
66 is challenging in DMD patients.<sup>7</sup>

67

68 The mechanisms responsible for arrhythmias and SCD in patients with DMD  
69 cardiomyopathy are poorly understood. The dystrophin associated protein complex  
70 (DAPC) is involved in mechanoprotection of the plasma membrane.<sup>8</sup> The DAPC acts also  
71 as a putative cellular signaling complex that forms a scaffold for numerous signaling and  
72 membrane ion channel proteins.<sup>9-11</sup> Absence of dystrophin in DMD has the potential to  
73 alter trafficking, localization and function of DAPC associated proteins in skeletal and  
74 cardiac muscle.<sup>12</sup> For example, the expression and function of ion channels are defective  
75 in ventricular cardiomyocytes of the *mdx* mouse model.<sup>10, 13-16</sup> Absence of dystrophin in  
76 young *mdx* mice affects the function of Nav1.5, leading to cardiac conduction defects.<sup>10</sup>  
77 Inward rectifier potassium current  $I_{K1}$  is reduced in the *mdx* mouse<sup>14</sup> but the  
78 consequences of the disruption have not been identified.

79

80 Results from our laboratory and others strongly suggest that Nav1.5 and Kir2.1 control  
81 cardiac excitability by mutually modulating each other's surface expression.<sup>11, 16-20</sup> At the  
82 lateral membrane, Nav1.5 and Kir2.1 channels form macromolecular complexes  
83 ("channelosomes")<sup>21</sup> that include  $\alpha$ 1-syntrophin, which is a part of the DAPC.<sup>10</sup> Thus, we  
84 hypothesize that dystrophin gene mutations that truncate the Dp427 dystrophin isoform,  
85 disrupt Nav1.5 -  $\alpha$ 1-syntrophin - Kir2.1 interactions, altering the function of the most

86 important ion channels controlling cardiac excitability and conduction velocity, which  
87 would place the DMD patient at risk of arrhythmogenesis and SCD.

88

89 Here we have used matured ventricular-like iPSC-CMs derived from two genetically  
90 distinct hemizygous DMD males, a heterozygous DMD female and two unrelated healthy  
91 subjects (controls) to investigate the mechanisms underlying the arrhythmias associated  
92 with loss-of-function dystrophin mutations. We demonstrate that iPSC-CMs from patients  
93 with DMD cardiomyopathy have a dysfunction of the Nav1.5-Kir2.1 channelosome, which  
94 can be rescued by transfection with *SNTA1*, the gene coding the DAPC-related  
95 scaffolding protein  $\alpha$ 1-syntrophin.

96

## 97 **2. Methods**

98 **(See Supplemental Methods for details)**

99

100 **2.1 Ethics statement.** We obtained skin biopsies from 2 hemizygous DMD patients, 1  
101 heterozygous female, and 2 healthy subjects after written informed consent in accordance  
102 with the Helsinki Committee for Experiments on Human Subjects at Sheba Medical  
103 Center, Ramat Gan, Israel (Approval number: 7603-09-SMC), and with IRB  
104 HUM00030934 approved by the University of Michigan Human IRB Committee. The use  
105 of iPS cells and iPSC-CMs was approved by the Human Pluripotent Stem Cell Research  
106 Oversight (HPSCRO, #1062) Committee of the University of Michigan and the Spanish  
107 National Center for Cardiovascular Research (CNIC) Ethics Committee and the Regional  
108 Government of Madrid. Data will be available upon rationale request.

109

110 **2.2 Generation of iPSCs.** Cell lines were generated using Sendai virus CytoTune-iPS  
111 2.0 Sendai reprogramming kit (Thermo Fisher) for transfection of Yamanaka's factors, as  
112 described.<sup>22, 23</sup>

113

114 **2.3 Patient-specific iPSC-CMs monolayers (adapted from Herron et al. 2016).<sup>24</sup>** We  
115 obtained highly purified iPSC-CMs after directed cardiac differentiation. After 30 days in  
116 culture, cardiomyocytes were purified, dissociated and plated on Matrigel-coated

117 polydimethylsiloxane (PDMS) membranes at a density of ~200K cells per monolayer.  
118 Cells were maintained for 7 days before re-plating onto Matrigel-coated micropatterned  
119 PDMS for patch-clamp and immunostaining experiments. At least 3 separate  
120 cardiomyocyte differentiations were used for all the experiments.

121

122 **2.4 Micropatterning on PDMS (adapted from ref<sup>25</sup>).** Stamps were sonicated and then  
123 incubated with Matrigel diluted in water (Corning, 100 µg/mL) for 1 h. Then, 18 mm PDMS  
124 circles were UVO treated before micropatterning. An hour later, the Matrigel solution from  
125 the PDMS stamps was aspirated and each stamp was inverted onto each PDMS circle  
126 and removed one by one. The micropatterned PDMS was incubated overnight with  
127 pluronic-F127 at room temperature. Then, it was cleaned with antibiotic-antimycotic  
128 solution and exposed to UV light before re-plating cells. About 30,000 human iPSC-CMs  
129 were placed in the center of the micropatterned area. Cells were cultured on  
130 micropatterns at least 4 days prior to experiments.

131

132 **2.5 Electrophysiology.** We used standard patch-clamp recording techniques to measure  
133 the action potentials (APs), as well as sodium current ( $I_{Na}$ ), L-type calcium current ( $I_{CaL}$ ),  
134 and inward rectifier potassium current ( $I_{K1}$ ) in the whole-cell configuration. All experiments  
135 were conducted at room temperature, except for the AP recordings, which were obtained  
136 at 37°C and paced at 1 and 2 Hz.

137

138 **2.6 RT-PCR.** For quantitative evaluation of mRNA expression in each experimental  
139 group, total RNA was prepared using the RNeasy Mini Kit (Qiagen), including DNase  
140 treatment. cDNA was synthesized using SuperScript III First-Strand Synthesis System  
141 (Invitrogen). Quantitative PCR was performed using TaqMan Universal PCR Master Mix  
142 (Applied Biosystems) in the presence of primers for *SCN5A*, *CACNA1C* and *KCNJ2*. We  
143 calculated mRNA fold expression by the  $\Delta\Delta CT$  method using the 18S rRNA as the  
144 housekeeping gene. Every qPCR reaction was performed in triplicate and repeated using  
145 cDNA from at least 3 separate cardiomyocyte differentiation cultures.

146

147 **2.7 Western Blotting.** Standard Western blotting was applied and Image Lab software  
148 (Bio-Rad) was used for analysis. Total and biotinylated protein was obtained from  
149 iPSC-CM monolayers and resolved on SDS-PAGE gels. Membranes were probed with  
150 anti-human Dystrophin, Nav1.5 and Kir2.1 antibodies, using Actinin as the loading control  
151 for total protein analysis, Na/K-ATPase for biotinylation experiments, and cTnT as the  
152 marker for cardiomyocytes.

153  
154 **2.8 Immunofluorescence.** iPSC-CMs were plated on micropatterned PDMS, fixed,  
155 treated and analyzed as described in detail in *Supplemental Methods* (see also ref<sup>24</sup>)  
156 Images were recorded with a Nikon A1R confocal microscope (Nikon Instruments Inc.)  
157 and Leica SP8 confocal microscope (Leica Microsystems).

158  
159 **2.9 Optical Mapping.** Optical action potentials were recorded using the voltage-sensitive  
160 fluorescent dye FluoVolt (F10488; Thermo Scientific). Activation patterns were  
161 determined, and conduction velocity was measured as described previously.<sup>24, 26</sup>

162  
163 **2.10 Generation and Stable Transfection of *SNTA1-IRES-GFP*.** Non-viral piggy-bac  
164 vector encoding SNTA1-IRES-GFP were co-transfected with mouse transposase-  
165 expression vector into iPSCs cells. After 3–5 days GFP positive cells were selected by  
166 FACS sorter and grow-up. Every week, fluorescence was confirmed, and cells sorted to  
167 confirm cDNA stable integration into the cells. After that, iPSC-CMs differentiation  
168 protocol was applied as stated above.

169  
170 **3.0 Statistics.** All data are expressed as mean  $\pm$  SEM. In each data set a Grubbs' test  
171 was performed after data collection to determine whether a value should be considered  
172 as a significant outlier from the rest. Nonparametric Mann-Whitney test was used. Multiple  
173 comparisons were tested using two-way analysis of variance (ANOVA) followed by  
174 *Sidak's* or *Dunnett's* test using Prism 8.  $P < 0.05$  was considered significant. All  
175 experiments were performed as a single-blind study to avoid sources of bias.

176  
177 **3. Results**

178

### 179 **3.1 Clinical characteristics**

180

181 We generated iPSC-CM lines from reprogrammed skin fibroblasts that were collected  
182 from 3 patients suffering from DMD cardiomyopathy. Two male hemizygous had a clinical  
183 and genetic diagnosis for DMD; the third patient was a DMD heterozygous female (*Figure*  
184 *1*). iPSC-CMs from a healthy subject unrelated to the patients (Control 1) and a line of BJ  
185 iPSC-CMs (Control 2) acted as negative controls. Complete clinical data were accessible  
186 for one DMD male and the heterozygous female. The hemizygous male (Male 1)  
187 harboring a nonsense point mutation in the dystrophin gene (exon 41) experienced DMD  
188 from early childhood, being diagnosed with dilated cardiomyopathy at age 17. Eight years  
189 later he was hospitalized in respiratory and heart failure (LVEF = 15%), requiring  
190 tracheostomy and prolonged ventilation. An ECG exhibited sinus rhythm with a narrow  
191 QRS and QR pattern in L1, AVL and QS leads V2–3 (*Figure 1a*). At age 30, the patient  
192 became respirator-dependent with a reasonably controlled heart failure. A routine Holter-  
193 ECG obtained three years later showed frequent premature ventricular complexes and  
194 episodes of non-sustained ventricular tachycardia at rates of up to 200/min. An ICD was  
195 implanted, which discharged appropriately 2 years later for repeated episodes of  
196 ventricular flutter deteriorating into ventricular fibrillation (*Figure 1b*). Three years later,  
197 the patient expired of heart failure at age 38.

198

199 The female patient, heterozygous for a deletion of 5 exons ( $\Delta 8-12$ ) in the dystrophin  
200 gene, presented proximal muscle weakness with creatine kinase elevation at age 42. She  
201 had a son with DMD who died at 16. At presentation, she exhibited biventricular  
202 dysfunction with left ventricular dimension of 65 mm, LVEF of 30% and moderate to  
203 severe mitral insufficiency. At age 49, she developed severe biventricular dysfunction with  
204 LVEF=20% and severe tricuspid regurgitation. She was in NYHA IV, and the cardio-  
205 respiratory exercise test showed a  $VO_2$  max of 6 mL/kg/min, indicating a severely reduced  
206 aerobic capacity. An ECG obtained at age 50 revealed severe QRS widening and QT  
207 prolongation (*Figure 1c*). At that time, she had LVEF 30–35% and her heart failure was  
208 relatively well controlled. A year later, she developed paroxysmal atrial fibrillation with



209 rapid ventricular response and recurrent episodes of non-sustained ventricular  
210 tachycardia (*Figure 1d*). AV nodal ablation and CRTD pacemaker-defibrillator  
211 implantation was required. The patient died at 51 in end-stage heart failure associated  
212 with renal insufficiency.

213

214 The additional DMD patient (Male 2) was a 13-year-old male carrying a 6-exon dystrophin  
215 deletion ( $\Delta 45-50$ ). The patient was non-ambulatory (used a motorized wheelchair) but  
216 respirator free at the time of the skin biopsy. He did not have significant cardiomyopathy  
217 at the time of collection, which was not surprising given his young age and the typical  
218 presentation of DMD cardiomyopathy as later onset.<sup>27, 28</sup> No follow-up information is  
219 available for this patient. The unrelated healthy individuals (Controls 1 and 2) have no  
220 personal or family history of DMD or any related disease.

221

### 222 **3.2 Dystrophin is absent in iPSC-CMs derived from hemizygous DMD patients**

223

224 Compared to Control-1 iPSC-CMs and to left ventricle samples from a patient with Becker  
225 dystrophy, iPSC-CMs from hemizygous males were deficient in the full-length adult  
226 DP427 dystrophin isoform (*Figure 2a-b*). The iPSC line named Male 2 shows a deletion  
227 of exons 45–50, while the other dystrophic cell line (Male 1) presents a nonsense point  
228 mutation (R1967X) in exon 41 of the dystrophin gene constituting a premature stop  
229 codon. The cell line generated from the 50-year-old DMD heterozygous female carried a  
230 deletion of exons 8–12. Notably, her iPSC-CMs showed expression of dystrophin protein  
231 like the control (*Figure 2a-b*).

232

### 233 **3.3 Micropatterning controls cell shape and facilitates electrophysiological** 234 **recordings**

235

236 Cell shape is critical for cardiomyocyte electrical, mechanical and contractile function.<sup>25</sup>  
237 Adopting the typical cylindrical morphology helps improve contractility, which promotes  
238 electrophysiological phenotype maturation.<sup>29</sup> When cultured on a non-micropatterned  
239 smooth surface, DMD iPSC-CMs are flat-shaped and have a frail membrane making them



240 a challenge for patch-clamp experiments (*Figure 2c, left*). Therefore, we plated and fixed  
241 our iPSC-CMs on Matrigel-coated micropatterned PDMS (*Figure 2c, right*). The approach  
242 produces large numbers of thick cylindrical-shaped, binucleated cardiomyocytes with  
243 well-organized sarcomeres (*Figure 2d*), which are two important signs of maturation.  
244 Micropatterned iPSC-CMs are easier to patch. They are electrically excitable and their  
245 electrical phenotype approaches the adult human cardiomyocyte, with maximum diastolic  
246 potentials (MDP) of -70 to -80 mV, and action potential durations (APDs) of 200–300 ms  
247 (see below).<sup>30, 31</sup> On the other hand, as shown in *Figure 2e*, unlike control cells,  
248 immunostained DMD cells do not express dystrophin, whereas iPSC-CMs from the  
249 female patient show variable expression of dystrophin.

250

### 251 **3.4 Action potentials in dystrophic iPSC-CMs have a reduced maximum upstroke** 252 **velocity**

253

254 Clinically, DMD patients may experience cardiac complications and often exhibit electrical  
255 conduction abnormalities and life-threatening arrhythmias (see *Figure 1* above).<sup>32, 33</sup> At  
256 the cellular level, such alterations are often the result of reduced excitability. We therefore  
257 conducted patch-clamp recordings in micropatterned iPSC-CMs in the current-clamp  
258 configuration. In *Suppl. Tables 1–3* we present comparisons at two different frequencies  
259 for DMD versus Control 1 (*Suppl. Table 1*), DMD versus Control 2 (*Suppl. Table 2*) and  
260 Control 1 vs Control 2 (*Suppl. Table 3*). We quantitated AP parameters such as maximal  
261 upstroke velocity ( $dV/dt_{max}$ ), overshoot, AP amplitude, MDP and AP duration. Statistical  
262 analysis demonstrated that Control 1 and Control 2 were very similar to each other, both  
263 exhibiting well-polarized MDPs,  $dV/dt_{max}$  larger than 40 V/sec and amplitudes larger than  
264 100 mV. However, they both differed significantly from all three DMD groups (see *Figure*  
265 *3 and Suppl. Figure 1a–f*), particularly in terms of  $dV/dt_{max}$ . iPSC-CMs from both DMD  
266 male and female patients revealed abnormal AP profiles compared to both controls. For  
267 example, Overshoot and amplitude were lower in the Male 2 cells compared to the  
268 controls. In addition, female DMD cells showed a more depolarized MDP than control  
269 iPSC-CMs (*Figure 3e*). Finally, no significant differences existed in  $APD_{90}$  values and

270 similar action potential parameter changes were obtained at 2 Hz (*Suppl. Table 1,*  
271 *Suppl. Figures 1a–f* and 2).

272

### 273 **3.5 Conduction velocity is impaired in DMD iPSC-CM monolayers**

274

275 The reduced  $dV/dt_{max}$  at the single cell level suggested that conduction velocity (CV) may  
276 be compromised in iPSC-CMs monolayers from affected individuals. Hence, we  
277 conducted optical mapping experiments using the voltage-sensitive fluorescent dye  
278 FluoVolt™ in control, DMD, and female iPSC-CM monolayers paced at various  
279 frequencies (*Figure 4a*). CV in dystrophin-deficient iPSC-CM monolayers was 50% slower  
280 than control monolayers paced at 1 Hz ( $27 \pm 2$  cm/s and  $29 \pm 4$  cm/s in hemizygous Male  
281 1 and Male 2 cells, respectively, versus  $56 \pm 3$  cm/s in control cells, *Figure 4b–c*). CV of  
282 Control 2 monolayers was  $42 \pm 5$  cm/s (*Suppl. Figure 3*). Remarkably, CV in the  
283 heterozygous female monolayers was even slower ( $18 \pm 3$  cm/s). In all three groups, the  
284 CV restitution curve displayed slightly slower velocities at higher frequencies (*Figure 4d*).  
285 Most important, in the female monolayer (*Figure 4e*), slower and more heterogeneous  
286 patterns of electrical wave propagation were accompanied by focal discharges in the form  
287 of trigeminy (*Figure 4e, left*), which often triggered unidirectional block and reentry (*Figure*  
288 *4e, right, and Suppl. Video 1 and 2*). Altogether, the data presented in *Figures 3 and 4*  
289 provide a direct mechanistic explanation for the conduction abnormalities and arrhythmias  
290 seen on the ECGs of at least two of the patients (see *Figure 1*). In all three iPSC-CMs  
291 from affected individuals, the reduced CV occurred in the absence of measurable  
292 changes in connexin43 (Cx43) protein (*Suppl. Figure 4*). We did not detect any significant  
293 differences in Cx43 expression among control, heterozygous, and hemizygous  
294 iPSC-CMs in these monolayer experiments.

295

### 296 **3.6 Sodium current is down-regulated in DMD iPSC-CMs**

297

298 Sodium channels determine the upstroke velocity of the cardiac action potential and  
299 consequently play a key role in the conduction of the cardiac electrical impulse.<sup>34</sup> Here  
300 we compared the sodium current ( $I_{Na}$ ) density in the DMD male and female iPSC-CMs

301 versus each of the controls. In *Figure 5a* and *b*, the peak inward  $I_{Na}$  density in hemizygous  
302 iPSC-CMs was significantly decreased ( $-14 \pm 1$  pA/pF for Male 1 cells and  $-15 \pm 1$  pA/pF  
303 for Male 2 cells) compared to both Control 1 ( $-27 \pm 3$  pA/pF) and Control 2 iPSC-CMs ( $-38$   
304  $\pm 1$  pA/pF; *Suppl. Figure 1g*, *Suppl. Table 4 and 5*). Importantly, the  $I_{Na}$  density in  
305 heterozygous female cells was also dramatically reduced ( $-11 \pm 1$  pA/pF). Altogether,  
306 except for peak sodium current density, statistical comparisons in terms of biophysical  
307 properties of  $I_{Na}$  (half maximal activation, slope factor, reversal potential) for DMD vs  
308 Control 1 (*Suppl. Table 4*), DMD vs Control 2 (*Suppl. Table 5*) and Control 1 vs Control 2  
309 (*Suppl. Table 6*) showed no differences among any of the groups. Also, as shown in  
310 *Suppl. Figure 5*, cell capacitance in all the patient-specific cells was similar to control,  
311 indicating that cell size was similar in all groups.

312

313 The above data indicate that dystrophin deficiency reduces the  $I_{Na}$  density, which may be  
314 considered one of the main causes for the cardiac conduction defects reported in DMD  
315 patients.<sup>35, 36</sup> The absence of dystrophin might also affect other ionic currents. For  
316 instance, the L-type calcium current ( $I_{Ca,L}$ ) is increased in cardiomyocytes from adult *mdx*  
317 mice.<sup>13, 37</sup> In addition, as previously suggested,  $I_{Ca,L}$  density is increased in iPSC-CMs  
318 from DMD patients.<sup>35</sup> However, under our experimental conditions,  $I_{Ca,L}$  was unaltered in  
319 hemizygous and heterozygous DMD iPSC-CMs (*Suppl. Tables 4–6* and *Suppl. Figures*  
320 *1h* and *6*). Differences in culture conditions and cell maturation (see Methods and Ref<sup>24</sup>)  
321 might have contributed to the different outcomes in the two studies.

322

### 323 **3.7 DMD iPSC-CMs have reduced inward rectifier potassium currents**

324

325 Apart from the well-described regulation of Nav1.5 channels by the DAPC,<sup>10, 17</sup> there is  
326 evidence that this protein complex also regulates Kir2.1 inward rectifying potassium  
327 channels in *mdx* cardiomyocytes.<sup>14</sup> Moreover, a pool of Nav1.5 channels co-localizes with  
328 Kir2.1 forming protein complexes with scaffolding proteins at the cardiomyocyte lateral  
329 membrane and intercalated disc, where they modulate each other's surface expression.<sup>11,</sup>  
330 <sup>19, 20</sup> To test whether, in addition to  $I_{Na}$ , the inward rectifier potassium current is also  
331 affected in iPSC-CMs from DMD patients, we compared Ba<sup>2+</sup>-sensitive potassium

332 currents ( $I_{K1}$ ). In *Figure 5c* and *d*,  $I_{K1}$  density measured at -120 mV was significantly  
333 reduced in Male 1 ( $-1 \pm 0.3$  pA/pF) and Male 2 ( $-1.2 \pm 0.3$  pA/pF) iPSC-CMs compared to  
334 Control 1 ( $-3.2 \pm 0.5$  pA/pF).  $I_{K1}$  density of Control 2 cells was  $-2.6 \pm 0.6$  pA/pF (*Suppl.*  
335 *Figure 1i*). Changes in  $I_{K1}$  were highly variable in heterozygous cells, and the difference  
336 with control was not significant, likely due to the variability of expression of dystrophin  
337 (*Figure 2e*) and other proteins forming the complex.

338

### 339 **3.8 Ion channel gene expression profile in male and female DMD iPSC-CMs**

340

341 Previous reports have shown that when one of the DAPC components is genetically  
342 absent, other proteins of the complex are likewise down-regulated, leading to a  
343 dysfunction of the complex.<sup>38</sup> To confirm whether this phenomenon occurs in both  
344 hemizygous and heterozygous DMD iPSC-CMs, we analyzed the mRNA levels, and  
345 protein expression of the cardiac ion channels Nav1.5 (encoded by *SCN5A* gene), Kir2.1  
346 (encoded by *KCNJ2* gene) and Cav1.2 (encoded by *CACNA1C* gene).

347

348 Consistent with what has been described for mdx mice,<sup>10</sup> both hemizygous DMD  
349 iPSC-CMs showed increased *SCN5A* expression (*Suppl. Figure 7a, top*), also like human  
350 cardiac tissue from a Becker MD (BMD) individual (*Suppl. Figure 7a, bottom*). Similarly,  
351 *KCNJ2* gene expression was up-regulated in both hemizygous DMD cell lines, as well as  
352 the BMD individual (*Suppl. Figure 7b*). This suggests that the increase in cardiac *SCN5A*  
353 and *KCNJ2* mRNA levels might be a general compensatory phenomenon in DMD  
354 patients. On the other hand, consistent with the unaffected  $I_{CaL}$ , neither *CACNA1C* nor  
355 Cav1.2 were modified in either male or female DMD iPSC-CMs compared to control  
356 (*Suppl. Figure 7c*).

357

358 To test whether the decreased  $I_{K1}$  and  $I_{Na}$  in both DMD iPSC-CMs were due to reduced  
359 Nav1.5 and Kir2.1 protein levels, we performed Western blot experiments with total  
360 protein lysates of iPSC-CMs monolayers. In *Suppl. Figure 8a–b*, the absence of  
361 dystrophin coincided with a consistent reduction of total Nav1.5 protein. Surprisingly, we  
362 did not observe any change in total Kir2.1 protein. To investigate whether the reduced  $I_{K1}$

363 and  $I_{Na}$  in DMD iPSC-CMs was due to reduced membrane protein levels, we conducted  
364 protein biotinylation assays (*Suppl. Figure 8c–d*). Biotinylated Nav1.5 was significantly  
365 lower than control in the Male 2 cell line only. Biotinylated Kir2.1 was significantly reduced  
366 the hemizygous cells, consistent with the reduction in  $I_{K1}$ . Altogether, the results  
367 presented thus far support the idea that, the absence of dystrophin in the DMD iPSC-CMs,  
368 resulted in reduced abundance of Nav1.5 protein in the whole cell and possibly reduced  
369 trafficking of both Nav1.5 and Kir2.1 to the cell membrane, as predicted from our previous  
370 work.<sup>19-21</sup>

371  
372 The data in iPSC-CMs from the heterozygous female are more challenging. Nav1.5 total  
373 protein levels and biotinylated Nav1.5 channels were not different from control (*Suppl.*  
374 *Figure 8*), but the  $I_{Na}$  density in single iPSC-CMs was even smaller than in DMD  
375 iPSC-CMs. This, together with the lack of significance in the changes of  $I_{K1}$  density, total  
376 Kir2.1 protein level, and biotinylated Kir2.1, lead us to conclude that the large variability  
377 in the expression of dystrophin significantly influenced the overall results in the  
378 heterozygous cells.

### 379 380 **3.9 $\alpha$ -1-Syntrophin expression restores electrophysiological defects in DMD** 381 **iPSC-CMs**

382  
383 In the heart, the dystrophin-associated protein  $\alpha$ 1-syntrophin (*SNTA1*) acts as a scaffold  
384 for numerous signaling and ion channel proteins that control cardiac excitability.<sup>33, 38, 39</sup>  
385  $\alpha$ 1-syntrophin is a PDZ domain protein that co-localizes and forms a macromolecular  
386 complex (“channelosome”) with Kir2.1 and Nav1.5 at the sarcolemma.<sup>17, 19 39 11</sup> Since  $\alpha$ 1-  
387 syntrophin has been shown to modify  $I_{Na}$  and  $I_{K1}$  by enhancing membrane Nav1.5 and  
388 Kir2.1 membrane levels,<sup>19</sup> we hypothesized that even in the absence of dystrophin,  
389 increasing  $\alpha$ 1-syntrophin should restore normal electrical function in the DMD iPSC-CMs.  
390 Therefore, we stably transfected *SNT1A* gene via piggyBac transposon-based  
391 mammalian cell expression system in Male 1 cells verifying an increase in syntrophin  
392 expression (*Figure 6a* and *b*). As illustrated in *Figure 6c*,  $\alpha$ 1-syntrophin expression  
393 increased the Kir2.1 and Nav1.5 protein levels in the membrane fraction as indicated by

394 co-localization with wheat germ agglutinin (WGA) compared to controls transfected with  
395 GFP. In *Figure 7a–b*,  $\alpha 1$ -syntrophin expression resulted in a recovery of both  $I_{Na}$  (*Figure*  
396 *8a*) and  $I_{K1}$  (*Figure 8b*). Consequently, as shown in *Figure 7c*, *SNT1A* transfection led to  
397 significant improvement in the electrophysiological properties of DMD iPSC-CMs. The  
398 MDP was hyperpolarized, the  $dV/dt_{max}$  and amplitude were increased and the  $APD_{90}$  was  
399 abbreviated.

400

#### 401 **4. Discussion**

402

403 We demonstrate here that patient-specific iPSC-CMs recapitulated consistently the  
404 hallmark electrophysiologic features of cardiomyopathic DMD patients.<sup>33</sup> In fact, mature  
405 iPSC-CMs from two hemizygous male DMD patients lacking the Dp427 isoform and a  
406 female patient heterozygous for a 5-exon deletion ( $\Delta 8-12$ ) in the dystrophin gene have  
407 significantly reduced  $I_{Na}$  and  $I_{K1}$  densities,  $dV/dt_{max}$  and conduction velocities, as well as  
408 focal and reentrant arrhythmias. Together, these results strongly suggest that reduced  
409 excitability underlies the arrhythmogenic mechanism in DMD patients. While all patients  
410 developed severe cardiomyopathy, they also suffered frequent PVCs and ventricular  
411 tachycardia. In addition, the ECG of the heterozygous female DMD patient showed a  
412 significant left axis deviation caused by cardiac conduction defects in line with our results.  
413 In one of the male patients, ICD recordings revealed the arrhythmia deteriorating into  
414 ventricular fibrillation.<sup>40</sup> Our results in patient-specific iPSC-CMs indicate that such  
415 defects are a direct consequence of a Nav1.5 -  $\alpha 1$ -syntrophin - Kir2.1 channelosome  
416 dysfunction produced by the disruption of the DAPC that characterizes the DMD  
417 cardiomyopathy. Remarkably, transfecting just one of the components of that complex  
418 (i.e.,  $\alpha 1$ -syntrophin) in Male 1 iPSC-CMs led to channelosome recovery at the plasma  
419 membrane, with restoration of  $I_{Na}$  and  $I_{K1}$  densities, MDP, AP  $dV/dt_{max}$  and amplitude. To  
420 our knowledge, this report is first in providing a comprehensive and rigorous mechanistic  
421 demonstration of the potential causes of cardiac conduction defects and  
422 arrhythmogenesis in human DMD, substantially extending findings from animal models.<sup>10</sup>  
423



424 ECG abnormalities can be detected in up to 60% of DMD patients,<sup>33</sup> and among those,  
425 conduction defects, bradycardia, ventricular arrhythmias, and sudden death are  
426 frequent.<sup>36</sup> However, despite significant progress in the understanding of the mechanisms  
427 of the skeletal muscle dystrophy, exploration of the electrophysiological consequences of  
428 the dystrophic cardiomyopathy has been slower. Until now, it has been difficult to link  
429 functional changes in individual ion channels/proteins with corresponding clinical  
430 phenotypes in inheritable ion channel diseases and cardiomyopathies such as DMD.<sup>41</sup>

431

432 Both Nav1.5 and Kir2.1 interact with the DAPC via  $\alpha$ 1-syntrophin through their respective  
433 canonical C-terminal PDZ binding domains. As shown recently, Nav1.5 has an additional  
434 internal PDZ-like binding domain localized at the N-terminus that also interacts with  
435  $\alpha$ 1-syntrophin.<sup>10, 19</sup> Changes in the  $I_{Na}$  and  $I_{K1}$  might alter cardiac conduction and increase  
436 the probability of premature beats like those seen in the ECG from the DMD patient.<sup>10</sup> We  
437 proved here that in addition to reduced  $I_{Na}$ , iPSC-CMs from DMD patients also have  
438 reduced  $I_{K1}$  and probably alterations in other proteins altogether causing pro-arrhythmic  
439 alteration in electrical impulse conduction, likely because of trafficking disruption of the  
440  $\alpha$ 1-syntrophin-mediated macromolecular complex formed by the DAPC with Kir2.1-  
441 Nav1.5.

442

443 Maturation of iPSC-CMs is essential for human disease modeling and preclinical drug  
444 studies.<sup>26, 42</sup> Culturing iPSC-CM monolayers on soft PDMS membranes coated with  
445 Matrigel promotes cell maturation.<sup>24</sup> Also, there are several reports indicating that the  
446 regulation of cell shape and substrate stiffness helps improve the contractile activity and  
447 maturation of iPSC-CMs.<sup>25, 29</sup> Thus, having cells with ventricular-like action potentials and  
448 structural and electrophysiological maturity that approximates the human adult ventricular  
449 cardiomyocyte is likely to be more useful in investigating the pathophysiology of DMD  
450 patients. Therefore, here we used a micropatterning platform based on Matrigel-coated  
451 PDMS membrane<sup>24</sup> for modeling single-cell cardiac electrical activity. Our findings  
452 showed that culturing single ventricular-like iPSC-CMs on micropatterned Matrigel-coated  
453 PDMS confers a cylindrical shape yielding iPSC-CMs with structural and functional  
454 phenotypes close to those in human mature cardiomyocytes.<sup>30, 31</sup> Electrophysiological



455 analyses in this scenario revealed abnormal action potential profiles in DMD iPSC-CMs,  
456 compatible with the clinical alterations observed in both male 1 and female DMD patients.  
457 The strong reduction in  $I_{Na}$  density yielded a significant slowing of  $dV/dt_{max}$ , considered to  
458 be an indirect measure of the available functional sodium channels.<sup>43</sup> Reduction in  $I_{Na}$   
459 density was consistent with the relative loss of total Nav1.5 protein levels, and helped us  
460 explain the reduced conduction velocity in iPSC-CMs from DMD patients. Like other  
461 studies,<sup>17, 44</sup> we did not find any change in Cx43 protein levels.

462  
463 QRS widening and QTc prolongation displayed on the ECGs from the DMD patients are  
464 likely related to the changes in functional expression of Nav1.5 and Kir2.1 we have  
465 observed in their iPSC-CMs. Both QRS widening and QT dispersion are risk factors for  
466 arrhythmias in patients with DMD, and have been implicated in the genesis of ventricular  
467 arrhythmias.<sup>45</sup> Interestingly some of the AP parameters of the hemizygous Male 2  
468 iPSC-CMs, including  $dV/dt_{max}$ , AP amplitude and overshoot (Table 1), were substantially  
469 more reduced than Male 1 and the heterozygous female iPSC-CMs. Such differences are  
470 possibly due to the specific mutation in the dystrophin gene. Thus, depending on the  
471 mutation in the dystrophin gene each male or female DMD patient might develop different  
472 types or levels of cardiac electrical dysfunction and life-threatening arrhythmias.

473  
474  $I_{Na}$  reduction coincided with  $I_{K1}$  reduction in both hemizygous DMD iPSC-CMs, supporting  
475 the idea that both channels require PDZ-mediated interaction with components of the  
476 DAPC to modulate reciprocally their proper expression.<sup>10, 18</sup> It is likely that the reduced  $I_{K1}$   
477 in the DMD iPSC-CMs contributed to the reduced  $dV/dt_{max}$ , although the MDP in the  
478 iPSC-CMs from the two dystrophic patients was like control. In this regard, it is important  
479 to note that the relationship between MDP and  $I_{Na}$  availability is highly nonlinear in such  
480 a way that a very small reduction in MDP is expected to result in substantial reduction in  
481 sodium current during the action potential upstroke.<sup>46</sup> Regardless, the biotinylation  
482 experiments demonstrated that Kir2.1 levels at the membrane were significantly lower in  
483 both DMD iPSC-CMs with respect to the control. The elevated *SCN5A* and *KCNJ2* mRNA  
484 levels excluded the possibility that a decrease in gene expression was responsible for the  
485 protein loss, and therefore, to smaller  $I_{Na}$  and  $I_{K1}$  densities in the DMD iPSC-CMs. This

486 somehow contrasts with reports in *mdx*<sup>5cv</sup> mouse hearts, where the Nav1.5 mRNA levels  
487 remained unchanged with a strong reduction in the Nav1.5 protein levels.<sup>10</sup> As such, the  
488 reduction in the Nav1.5 and Kir2.1 protein levels could be related to ubiquitylation and  
489 proteasome degradation as suggested previously in studies in dystrophin-deficient *mdx*<sup>5cv</sup>  
490 mice.<sup>47</sup> However, our results in DMD iPSC-CMs strongly suggest that disruption of the  
491 DAPC due to lack of dystrophin significantly impairs ion channel expression and  
492 function.<sup>10, 15, 16</sup> Specifically, we demonstrate that the decrease in ion channel current  
493 densities is the result of Nav1.5 and Kir2.1 trafficking and membrane targeting defects  
494 directly derived from the absence of dystrophin. Such defects can be completely reverted  
495 by  $\alpha$ 1-syntrophin expression, as demonstrated by increases in  $I_{Na}$  and  $I_{K1}$ , and restoration  
496 of MDP, action potential upstroke velocity and action potential amplitude, as well as APD  
497 abbreviation. On the other hand, the fact that both  $I_{Na}$  and  $I_{K1}$  are only partially reduced in  
498 the DMD iPSC-CMs suggests the presence of different pools of Nav1.5 and Kir2.1  
499 channels that do not depend on DAPC integrity. Altogether, our results support the idea  
500 that DMD cardiomyopathy results in ion channel dysfunction that predisposes the  
501 dystrophic ventricular myocardium to arrhythmia with potentially lethal consequences.

502

503 Previous reports indicate that although heterozygous DMD females, have negligible  
504 skeletal muscle symptoms, they are not free of cardiac involvement.<sup>48</sup> For example, the  
505 clinical expression of the X-linked DMD cardiomyopathy of heterozygous females  
506 increases with age.<sup>48</sup> The female patient represented in this study suffered from a relative  
507 severe phenotype, characterized by skeletal myopathy and cardiomyopathy, which could  
508 be explained by a malignant mutation disrupting the N-terminal of the dystrophin gene.  
509 One could assume that one gene of dystrophin should produce enough dystrophin to  
510 preserve function in multinucleated skeletal muscle of females.<sup>49</sup> Unexpectedly, we found  
511 that  $I_{Na}$  density in iPSC-CMs from the heterozygous female was even more reduced  
512 compared to hemizygous iPSC-CMs. Interestingly, the QRS duration was significantly  
513 prolonged on the ECG from the heterozygous female compared to the hemizygous  
514 patient (see Figure 1), suggestive of a more dramatic loss-of-function effect on Nav1.5 in  
515 heterozygous females. Probably this is related to the heterogeneity seen in  
516 immunostaining studies where some heterozygous female cells express normal

517 dystrophin levels while others show absence or very low expression likely due to random  
518 X-inactivation of the WT allele.<sup>23</sup> Because of random inactivation of one of the X  
519 chromosomes, heterozygous females should constitute a mosaic of 2 or more cell types  
520 dramatically differing in the extent of dystrophin expression. Thus, it would not be  
521 surprising that females with DMD are more prone to suffer arrhythmias because of spatial  
522 electrical inhomogeneity due to variable expression of the mutant allele. The  
523 heterogeneity in dystrophin expression has been also observed in canine *carrier* models  
524 of X-linked dystrophy, which exhibit a cardiac mosaic pattern, where dystrophin in each  
525 myocyte is either fully expressed or absent.<sup>50</sup> Nevertheless, the importance of abnormal  
526 cardiac measures in heterozygous females who harbor mutations in the dystrophin gene  
527 remains debatable.<sup>51</sup>

528

529 Even though  $I_{Na}$  density was substantially reduced in the heterozygous iPSC-CMs, neither  
530 the total Nav1.5 protein levels nor the biotinylated Nav1.5 showed any changes. Probably,  
531 the variable expression of dystrophin in female individuals results in variable Nav1.5  
532 protein levels, while Kir2.1 expression and function are modulated positively to help  
533 trafficking of the few pools of Nav1.5 channels belonging to the remaining DAPC. Another  
534 possibility that might explain the reduced  $I_{Na}$  in heterozygous iPSC-CMs is that the cells  
535 may lack a suitable compensatory response due to DAPC disorganization and  
536 malfunction. The chimeric nature of the dystrophin mutation in those cells likely makes it  
537 more difficult to support a compensatory mechanism than the complete absence of the  
538 DAPC complex as it occurs in dystrophic cells. Nonetheless, the very reduced  $I_{Na}$  and  
539 slowed CV reported in the present study perfectly correlates with the clinical data from  
540 the heterozygous female patient. Prolonged QRS duration is evidence of slowed  
541 ventricular activation and inhomogeneous conduction and might be associated with rotor  
542 activity as observed in the *female* iPSC-CMs monolayers, which is considered a substrate  
543 for reentrant ventricular tachycardia.<sup>52</sup> This becomes important because although  
544 controversial, heterozygous females may have an age-related increased risk of cardiac  
545 conduction disease and sudden death; in female patients of X-linked Emery-Dreifuss  
546 muscular dystrophy cardiac alterations typically occur late in life.<sup>53</sup>

547

548 **5. Limitations**

549

550 We have derived data from experiments conducted in iPSC-CMs from patients who carry  
551 independent dystrophin mutations and two unrelated controls, which may be a potential  
552 limitation of our study. The original study design included siblings for each DMD cell line.  
553 However, getting more experimental groups from the same family was not possible.  
554 Nevertheless, both DMD lines lack dystrophin, which gives credence to the idea that loss  
555 of dystrophin is important to the shared electrophysiological phenotype independently of  
556 the specific mutation. Further, we show new insight into how heterozygous DMD females  
557 might show a wide range of cardiac involvement, ranging from asymptomatic to severely  
558 impaired electrical cardiac function, particularly the highly reduced  $I_{Na}$  leading to slowing  
559 of conduction velocity, which is reflected on the ECG from the female patient. Thus,  
560 together with the structural alterations, the electrophysiological changes may contribute  
561 to left ventricular dysfunction in female DMD patients.<sup>54</sup> However, the impact of the finding  
562 that the female carrier of the mutation presents a decrease in  $I_{Na}$  is somehow mitigated  
563 by the fact that since she carries a different mutation, it is difficult to define how the  
564 reduction of the  $I_{Na}$  in the female carrier compares with the reduction observed in the  
565 affected individuals.

566

567 iPSC-CMs still show significant differences with adult ventricular cardiomyocytes and are  
568 still far from recapitulating chamber-specific and layer specific electrical phenotypes of  
569 the normal or dystrophic heart. In addition, we cannot generalize our results to patients  
570 with different dystrophic gene mutations, such as those underlying Becker muscular  
571 dystrophy, which lead to partially truncated dystrophins and may retain specific functional  
572 properties of full-length dystrophin. However, enrolling a Becker MD patient was not  
573 possible. Also, our syntrophin-mediated rescue experiments were limited to the Male 1  
574 iPSC-CMs line. While caution should be exerted when attempting to extrapolate to the  
575 other two DMD cell lines, it is important to note that the functional defects in the Nav1.5-  
576 Kir2.1 channelosome were very similar in the iPSC-CMs from all three patients, which  
577 gives credence to our interpretation.

578

579 **Data Availability**

580 Authors will make materials, data and associated protocols promptly available to readers  
581 without undue qualifications upon request.

582

583 Funding: This work was supported by National Institutes of Health R01 HL122352 grant; “la  
584 Caixa” Banking Foundation (HR18-00304); Fundación La Marató TV3: *Ayudas a la investigación*  
585 *en enfermedades raras* 2020 (LA MARATO-2020); and Instituto de Salud Carlos III to JJ.  
586 American Heart Association postdoctoral fellowship 19POST34380706s to J.V.E.N. Israel Science  
587 Foundation to OB and MA [824/19]. Rappaport grant [01012020RI]; and Niedersachsen  
588 Foundation [ZN3452] to OB; and US-Israel Binational Science Foundation (BSF) to OB and TH  
589 [2019039]. National Institutes of Health R01 AR068428 to DM and US-Israel Binational Science  
590 Foundation Grant [2013032] to DM and OB.

591

592 **Author Contributions:** E.N.J.V. and J.J. designed research, discussed results and  
593 strategy. E.N.J.V., conducted the experiments to characterize the DMD iPSC-CMs; M.A.  
594 cared for the DMD patients and provided the skin biopsies; A.M. conducted the patch-  
595 clamp experiments showing *SNTA1* rescue of electrical properties of DMD iPSC-CMs;  
596 M.L.V.P. differentiated, transfected and sorted the iPSC-CMs used in *SNTA1* rescue and  
597 helped in immunolocalization experiments; F.M.C.U. designed and generated the *SNTA1*  
598 piggyBac transposon-based constructs and conducted immunolocalization experiments;  
599 O.B. reprogrammed and characterized the iPSC lines. A.J.C. provided technical  
600 assistance in the generation of all the iPSC-CMs lines. A.J.C., G.G.S., A.M.D.R., and  
601 D.P.B. conducted, collected and analyzed the experiments. E.N.J.V. and J.J. wrote the  
602 manuscript. Critical revision of the manuscript: all authors.

603

604 **Acknowledgments:** We thank Dr. Adam Helms for help in the implementation of the  
605 micropattern technology. We also thank Joseph R. Dickens from the CSCAR-University  
606 of Michigan for his valuable guidance in the statistical analysis. Dov Freimark MD (from  
607 the Leviev Heart Center, Sheba Medical Center, Tel Hashomer, and Tel Aviv University,  
608 Israel) supported this study by caring for and enrolling the female patient. We thank Dr.  
609 Giovanna Giovinazzo and the staff of the CNIC Pluripotent Cell Unit for their help in  
610 processing the iPSCs used in the syntrophin-mediated rescue experiments. We are

611 grateful to patients who despite having a lethal disease agreed to undergo skin biopsy for  
612 the sake of science.

613

614 **Conflict of interest:** JJ. Elsevier royalties; Stembiosys Scientific Advisory Board, stock  
615 options; AMdR: Stembiosys consulting fees and stock options; TJH, Stembiosys Scientific  
616 Advisory Board, consulting fees and stock options; All other authors have no conflicts to  
617 declare.

618

619

## References

620

- 621 1. Hoffman EP, Monaco AP, Feener CC, Kunkel LM. Conservation of the Duchenne  
622 muscular dystrophy gene in mice and humans. *Science* 1987;**238**:347-350.
- 623 2. Anderson JL, Head SI, Rae C, Morley JW. Brain function in Duchenne muscular  
624 dystrophy. *Brain* 2002;**125**:4-13.
- 625 3. Corrado G, Lissoni A, Beretta S, Terenghi L, Tadeo G, Foglia-Manzillo G,  
626 Tagliagambe LM, Spata M, Santarone M. Prognostic value of electrocardiograms,  
627 ventricular late potentials, ventricular arrhythmias, and left ventricular systolic  
628 dysfunction in patients with Duchenne muscular dystrophy. *Am J Cardiol*  
629 2002;**89**:838-841.
- 630 4. Finsterer J, Stollberger C, Freudenthaler B, Simoni D, Hoftberger R, Wagner K.  
631 Muscular and cardiac manifestations in a Duchenne-carrier harboring a dystrophin  
632 deletion of exons 12-29. *Intractable Rare Dis Res* 2018;**7**:120-125.
- 633 5. Shirokova N, Niggli E. Cardiac phenotype of Duchenne Muscular Dystrophy:  
634 insights from cellular studies. *J Mol Cell Cardiol* 2013;**58**:217-224.
- 635 6. Yilmaz A, Sechtem U. Cardiac involvement in muscular dystrophy: advances in  
636 diagnosis and therapy. *Heart* 2012;**98**:420-429.
- 637 7. Yilmaz A, Gdynia HJ, Mahrholdt H, Sechtem U. Cardiovascular magnetic  
638 resonance reveals similar damage to the heart of patients with Becker and limb-  
639 girdle muscular dystrophy but no cardiac symptoms. *J Magn Reson Imaging*  
640 2009;**30**:876-877.
- 641 8. Petrof BJ, Shrager JB, Stedman HH, Kelly AM, Sweeney HL. Dystrophin protects  
642 the sarcolemma from stresses developed during muscle contraction. *Proc Natl*  
643 *Acad Sci U S A* 1993;**90**:3710-3714.
- 644 9. Constantin B. Dystrophin complex functions as a scaffold for signalling proteins.  
645 *Biochimica et biophysica acta* 2014;**1838**:635-642.
- 646 10. Gavillet B, Rougier JS, Domenighetti AA, Behar R, Boixel C, Ruchat P, Lehr HA,  
647 Pedrazzini T, Abriel H. Cardiac sodium channel Nav1.5 is regulated by a  
648 multiprotein complex composed of syntrophins and dystrophin. *Circ Res*  
649 2006;**99**:407-414.
- 650 11. Milstein ML, Musa H, Balbuena DP, Anumonwo JM, Auerbach DS, Furspan PB,  
651 Hou L, Hu B, Schumacher SM, Vaidyanathan R, Martens JR, Jalife J. Dynamic  
652 reciprocity of sodium and potassium channel expression in a macromolecular



- 653 complex controls cardiac excitability and arrhythmia. *Proc Natl Acad Sci U S A*  
654 2012;**109**:E2134-2143.
- 655 12. Lohan J, Culligan K, Ohlendieck K. Deficiency in Cardiac Dystrophin Affects the  
656 Abundance of the  $\alpha$ - $\beta$ -Dystroglycan Complex. *J Biomed*  
657 *Biotechnol* 2005;**2005**:28-36.
- 658 13. Koenig X, Rubi L, Obermair GJ, Cervenka R, Dang XB, Lukacs P, Kummer S,  
659 Bittner RE, Kubista H, Todt H, Hilber K. Enhanced currents through L-type calcium  
660 channels in cardiomyocytes disturb the electrophysiology of the dystrophic heart.  
661 *Am J Physiol Heart Circ Physiol* 2014;**306**:H564-573.
- 662 14. Rubi L, Koenig X, Kubista H, Todt H, Hilber K. Decreased inward rectifier  
663 potassium current IK1 in dystrophin-deficient ventricular cardiomyocytes.  
664 *Channels (Austin)* 2017;**11**:101-108.
- 665 15. Koenig X, Dysek S, Kimbacher S, Mike AK, Cervenka R, Lukacs P, Nagl K, Dang  
666 XB, Todt H, Bittner RE, Hilber K. Voltage-gated ion channel dysfunction precedes  
667 cardiomyopathy development in the dystrophic heart. *PLoS One* 2011;**6**:e20300.
- 668 16. Albesa M, Ogrodnik J, Rougier JS, Abriel H. Regulation of the cardiac sodium  
669 channel Nav1.5 by utrophin in dystrophin-deficient mice. *Cardiovasc Res*  
670 2011;**89**:320-328.
- 671 17. Petitprez S, Zmoos AF, Ogrodnik J, Balse E, Raad N, El-Haou S, Albesa M, Bittihn  
672 P, Luther S, Lehnart SE, Hatem SN, Coulombe A, Abriel H. SAP97 and dystrophin  
673 macromolecular complexes determine two pools of cardiac sodium channels  
674 Nav1.5 in cardiomyocytes. *Circ Res* 2011;**108**:294-304.
- 675 18. Leonoudakis D, Conti LR, Anderson S, Radeke CM, McGuire LM, Adams ME,  
676 Froehner SC, Yates JR, 3rd, Vandenberg CA. Protein trafficking and anchoring  
677 complexes revealed by proteomic analysis of inward rectifier potassium channel  
678 (Kir2.x)-associated proteins. *J Biol Chem* 2004;**279**:22331-22346.
- 679 19. Matamoros M, Perez-Hernandez M, Guerrero-Serna G, Amoros I, Barana A,  
680 Nunez M, Ponce-Balbuena D, Sacristan S, Gomez R, Tamargo J, Caballero R,  
681 Jalife J, Delpon E. Nav1.5 N-terminal domain binding to alpha1-syntrophin  
682 increases membrane density of human Kir2.1, Kir2.2 and Nav1.5 channels.  
683 *Cardiovasc Res* 2016;**110**:279-290.
- 684 20. Ponce-Balbuena D, Guerrero-Serna G, Valdivia CR, Caballero R, Diez-Guerra FJ,  
685 Jimenez-Vazquez EN, Ramirez RJ, Monteiro da Rocha A, Herron TJ, Campbell  
686 KF, Willis BC, Alvarado FJ, Zarzoso M, Kaur K, Perez-Hernandez M, Matamoros  
687 M, Valdivia HH, Delpon E, Jalife J. Cardiac Kir2.1 and NaV1.5 Channels Traffic  
688 Together to the Sarcolemma to Control Excitability. *Circ Res* 2018;**122**:1501-1516.
- 689 21. Perez-Hernandez M, Matamoros M, Alfayate S, Nieto-Marin P, Utrilla RG,  
690 Tinaquero D, de Andres R, Crespo T, Ponce-Balbuena D, Willis BC, Jimenez-  
691 Vazquez EN, Guerrero-Serna G, da Rocha AM, Campbell K, Herron TJ, Diez-  
692 Guerra FJ, Tamargo J, Jalife J, Caballero R, Delpon E. Brugada syndrome  
693 trafficking-defective Nav1.5 channels can trap cardiac Kir2.1/2.2 channels. *JCI*  
694 *Insight* 2018;**3**.
- 695 22. Eisen B, Ben Jehuda R, Cuttitta AJ, Mekies LN, Reiter I, Ramchandren S, Arad M,  
696 Michele DE, Binah O. Generation of Duchenne muscular dystrophy patient-  
697 specific induced pluripotent stem cell line lacking exons 45-50 of the dystrophin  
698 gene (IITi001-A). *Stem Cell Res* 2018;**29**:111-114.



- 699 23. Eisen B, Ben Jehuda R, Cuttitta AJ, Mekies LN, Shemer Y, Baskin P, Reiter I, Willi  
700 L, Freimark D, Gherghiceanu M, Monserrat L, Scherr M, Hilfiker-Kleiner D, Arad  
701 M, Michele DE, Binah O. Electrophysiological abnormalities in induced pluripotent  
702 stem cell-derived cardiomyocytes generated from Duchenne muscular dystrophy  
703 patients. *J Cell Mol Med* 2019;**23**:2125-2135.
- 704 24. Herron TJ, Rocha AM, Campbell KF, Ponce-Balbuena D, Willis BC, Guerrero-  
705 Serna G, Liu Q, Klos M, Musa H, Zarzoso M, Bizy A, Furness J, Anumonwo J,  
706 Mironov S, Jalife J. Extracellular Matrix-Mediated Maturation of Human Pluripotent  
707 Stem Cell-Derived Cardiac Monolayer Structure and Electrophysiological  
708 Function. *Circ Arrhythm Electrophysiol* 2016;**9**:e003638.
- 709 25. Kuo PL, Lee H, Bray MA, Geisse NA, Huang YT, Adams WJ, Sheehy SP, Parker  
710 KK. Myocyte shape regulates lateral registry of sarcomeres and contractility. *Am J*  
711 *Pathol* 2012;**181**:2030-2037.
- 712 26. da Rocha AM, Campbell K, Mironov S, Jiang J, Mundada L, Guerrero-Serna G,  
713 Jalife J, Herron TJ. hiPSC-CM Monolayer Maturation State Determines Drug  
714 Responsiveness in High Throughput Pro-Arrhythmia Screen. *Sci Rep*  
715 2017;**7**:13834.
- 716 27. de Souza F, Bittar Braune C, Dos Santos Nucera APC. Duchenne muscular  
717 dystrophy: an overview to the cardiologist. *Expert Rev Cardiovasc Ther*  
718 2020;**18**:867-872.
- 719 28. Szabo SM, Salhany RM, Deighton A, Harwood M, Mah J, Gooch KL. The clinical  
720 course of Duchenne muscular dystrophy in the corticosteroid treatment era: a  
721 systematic literature review. *Orphanet J Rare Dis* 2021;**16**:237.
- 722 29. Ribeiro AJ, Ang YS, Fu JD, Rivas RN, Mohamed TM, Higgs GC, Srivastava D,  
723 Pruitt BL. Contractility of single cardiomyocytes differentiated from pluripotent stem  
724 cells depends on physiological shape and substrate stiffness. *Proc Natl Acad Sci*  
725 *U S A* 2015;**112**:12705-12710.
- 726 30. Taggart P, Sutton PM, Boyett MR, Lab M, Swanton H. Human ventricular action  
727 potential duration during short and long cycles. Rapid modulation by ischemia.  
728 *Circulation* 1996;**94**:2526-2534.
- 729 31. Grandi E, Pandit SV, Voigt N, Workman AJ, Dobrev D, Jalife J, Bers DM. Human  
730 atrial action potential and Ca<sup>2+</sup> model: sinus rhythm and chronic atrial fibrillation.  
731 *Circ Res* 2011;**109**:1055-1066.
- 732 32. Fayssoil A, Nardi O, Orlikowski D, Annane D. Cardiomyopathy in Duchenne  
733 muscular dystrophy: pathogenesis and therapeutics. *Heart Fail Rev* 2010;**15**:103-  
734 107.
- 735 33. Finsterer J, Stollberger C. The heart in human dystrophinopathies. *Cardiology*  
736 2003;**99**:1-19.
- 737 34. Abriel H. Roles and regulation of the cardiac sodium channel Na<sup>v</sup> 1.5: recent  
738 insights from experimental studies. *Cardiovasc Res* 2007;**76**:381-389.
- 739 35. Yotsukura M, Miyagawa M, Tsuya T, Ishihara T, Ishikawa K. A 10-year follow-up  
740 study by orthogonal Frank lead ECG on patients with progressive muscular  
741 dystrophy of the Duchenne type. *J Electrocardiol* 1992;**25**:345-353.
- 742 36. Perloff JK. Cardiac rhythm and conduction in Duchenne's muscular dystrophy: a  
743 prospective study of 20 patients. *J Am Coll Cardiol* 1984;**3**:1263-1268.

- 744 37. Viola HM, Davies SM, Filipovska A, Hool LC. L-type Ca(2+) channel contributes to  
745 alterations in mitochondrial calcium handling in the mdx ventricular myocyte. *Am J*  
746 *Physiol Heart Circ Physiol* 2013;**304**:H767-775.
- 747 38. Araishi K, Sasaoka T, Imamura M, Noguchi S, Hama H, Wakabayashi E, Yoshida  
748 M, Hori T, Ozawa E. Loss of the sarcoglycan complex and sarcospan leads to  
749 muscular dystrophy in beta-sarcoglycan-deficient mice. *Hum Mol Genet*  
750 1999;**8**:1589-1598.
- 751 39. Gee SH, Madhavan R, Levinson SR, Caldwell JH, Sealock R, Froehner SC.  
752 Interaction of muscle and brain sodium channels with multiple members of the  
753 syntrophin family of dystrophin-associated proteins. *J Neurosci* 1998;**18**:128-137.
- 754 40. Hara H, Niwano S, Ito H, Karakawa M, Ako J. Evaluation of R-wave offset in the  
755 left chest leads for estimating the left ventricular activation delay: An evaluation  
756 based on coronary sinus electrograms and the 12-lead electrocardiogram. *J*  
757 *Electrocardiol* 2016;**49**:148-153.
- 758 41. Villa CR, Czosek RJ, Ahmed H, Khoury PR, Anderson JB, Knilans TK, Jefferies  
759 JL, Wong B, Spar DS. Ambulatory Monitoring and Arrhythmic Outcomes in  
760 Pediatric and Adolescent Patients With Duchenne Muscular Dystrophy. *Journal of*  
761 *the American Heart Association* 2015;**5**.
- 762 42. Ronaldson-Bouchard K, Yeager K, Teles D, Chen T, Ma S, Song L, Morikawa K,  
763 Wobma HM, Vasciaveo A, Ruiz EC, Yazawa M, Vunjak-Novakovic G. Engineering  
764 of human cardiac muscle electromechanically matured to an adult-like phenotype.  
765 *Nat Protoc* 2019;**14**:2781-2817.
- 766 43. Berecki G, Wilders R, de Jonge B, van Ginneken AC, Verkerk AO. Re-evaluation  
767 of the action potential upstroke velocity as a measure of the Na<sup>+</sup> current in cardiac  
768 myocytes at physiological conditions. *PLoS One* 2010;**5**:e15772.
- 769 44. Sanford JL, Edwards JD, Mays TA, Gong B, Merriam AP, Rafael-Fortney JA.  
770 Claudin-5 localizes to the lateral membranes of cardiomyocytes and is altered in  
771 utrophin/dystrophin-deficient cardiomyopathic mice. *J Mol Cell Cardiol*  
772 2005;**38**:323-332.
- 773 45. Okin PM, Devereux RB, Howard BV, Fabsitz RR, Lee ET, Welty TK. Assessment  
774 of QT interval and QT dispersion for prediction of all-cause and cardiovascular  
775 mortality in American Indians: The Strong Heart Study. *Circulation* 2000;**101**:61-  
776 66.
- 777 46. Shaw RM, Rudy Y. Electrophysiologic effects of acute myocardial ischemia: a  
778 theoretical study of altered cell excitability and action potential duration.  
779 *Cardiovasc Res* 1997;**35**:256-272.
- 780 47. Rougier JS, Gavillet B, Abriel H. Proteasome inhibitor (MG132) rescues Nav1.5  
781 protein content and the cardiac sodium current in dystrophin-deficient mdx (5cv)  
782 mice. *Front Physiol* 2013;**4**:51.
- 783 48. Florian A, Rosch S, Bietenbeck M, Engelen M, Stypmann J, Waltenberger J,  
784 Sechtem U, Yilmaz A. Cardiac involvement in female Duchenne and Becker  
785 muscular dystrophy carriers in comparison to their first-degree male relatives: a  
786 comparative cardiovascular magnetic resonance study. *Eur Heart J Cardiovasc*  
787 *Imaging* 2016;**17**:326-333.

- 788 49. Holloway SM, Wilcox DE, Wilcox A, Dean JC, Berg JN, Goudie DR, Denvir MA,  
789 Porteous ME. Life expectancy and death from cardiomyopathy amongst carriers  
790 of Duchenne and Becker muscular dystrophy in Scotland. *Heart* 2008;**94**:633-636.  
791 50. Kane AM, DeFrancesco TC, Boyle MC, Malarkey DE, Ritchey JW, Atkins CE,  
792 Cullen JM, Kornegay JN, Keene BW. Cardiac structure and function in female  
793 carriers of a canine model of Duchenne muscular dystrophy. *Res Vet Sci*  
794 2013;**94**:610-617.  
795 51. McCaffrey T, Guglieri M, Murphy AP, Bushby K, Johnson A, Bourke JP. Cardiac  
796 involvement in female carriers of duchenne or becker muscular dystrophy. *Muscle*  
797 *Nerve* 2017;**55**:810-818.  
798 52. Richards DA, Byth K, Ross DL, Uther JB. What is the best predictor of spontaneous  
799 ventricular tachycardia and sudden death after myocardial infarction? *Circulation*  
800 1991;**83**:756-763.  
801 53. Madej-Pilarczyk A. Clinical aspects of Emery-Dreifuss muscular dystrophy.  
802 *Nucleus* 2018;**9**:268-274.  
803 54. Lang SM, Shugh S, Mazur W, Sticka JJ, Rattan MS, Jefferies JL, Taylor MD.  
804 Myocardial Fibrosis and Left Ventricular Dysfunction in Duchenne Muscular  
805 Dystrophy Carriers Using Cardiac Magnetic Resonance Imaging. *Pediatr Cardiol*  
806 2015;**36**:1495-1501.

807

808 **Figures**

809

810

811

812

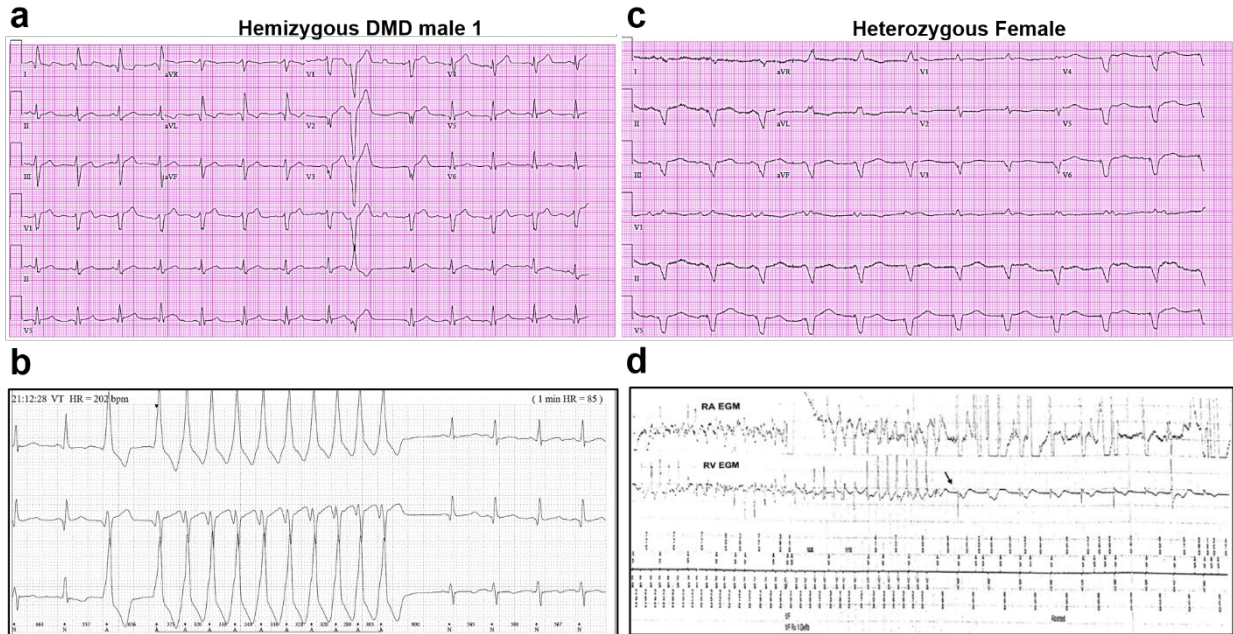

813

814

815 **Figure 1. Altered ECG and arrhythmias in DMD patients with cardiomyopathy. (a)**

816 Abnormal ECG in a 34-year-old DMD male: PR interval, 116 ms; QRS, 120 ms; QT/QTc,

817 404/472 ms; and PRT axes, 18-16-90. **(b)** Holter recording from the same patient shows

818 non-sustained monomorphic ventricular tachycardia. **(c)** Abnormal ECG from the

819 heterozygous female at 50-years of age: left axis deviation; QRS, 178 ms; QT/QTc,

820 564/612 ms; and PRT axes, 55-263-85. **(d)** Holter atrial electrograms of the heterozygous

821 female shows atrial fibrillation with complete AV block after AV nodal ablation. Ventricular

822 electrogram shows polymorphic ventricular tachycardia with spontaneous termination

823 (arrow) and resumption of ventricular pacing.

824



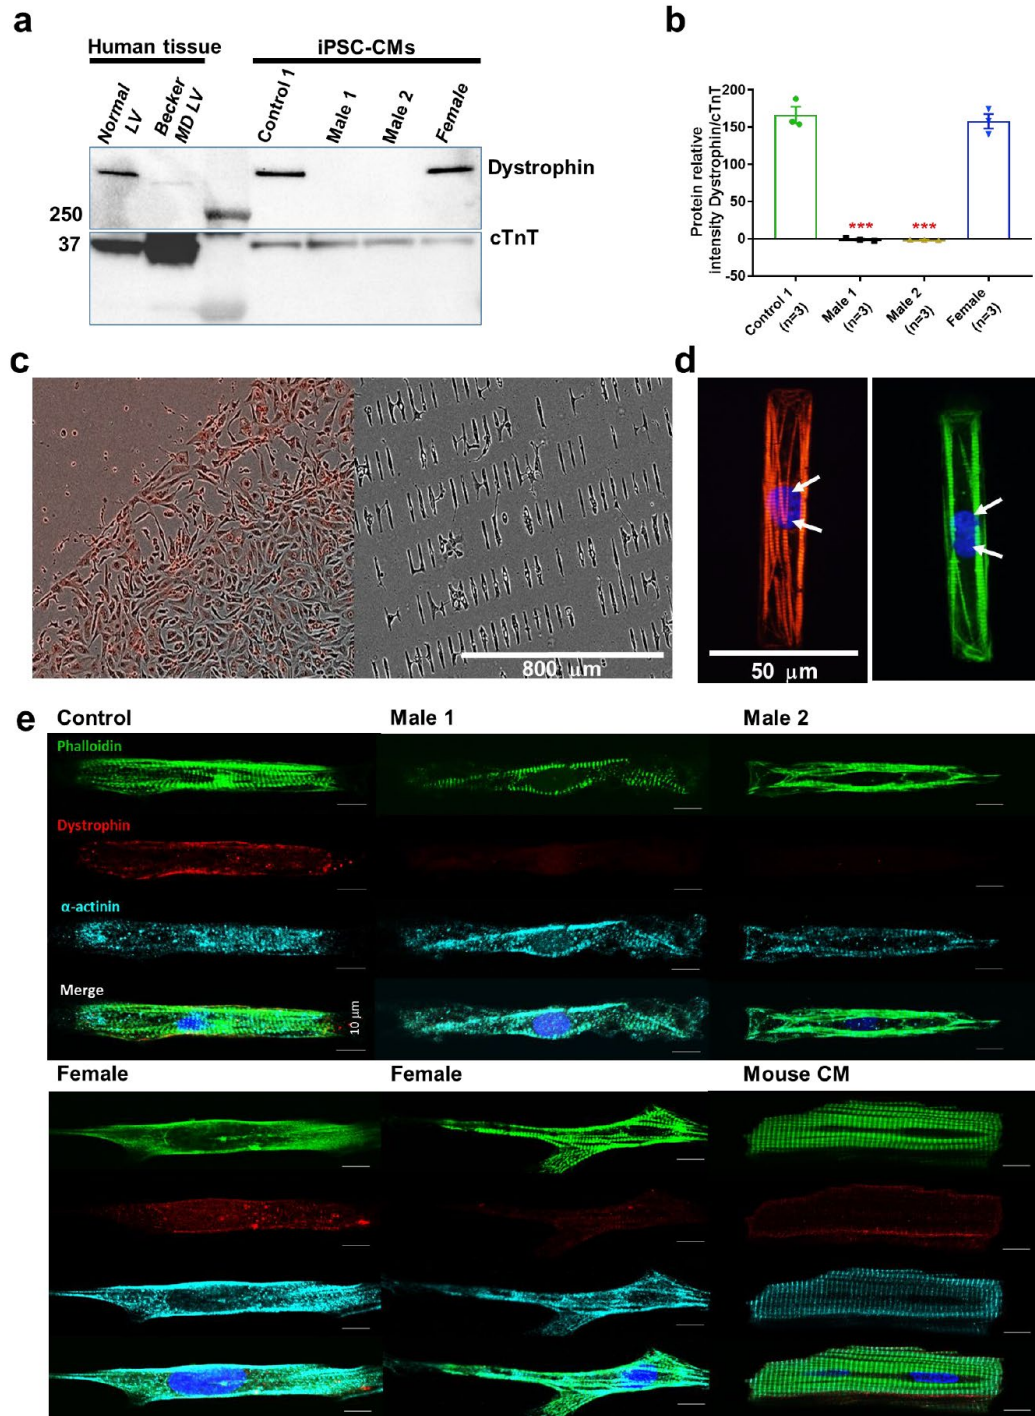

825

826

827 **Figure 2. DMD patient-specific iPSC-CMs do not express dystrophin.** (a) Top right,  
828 control and heterozygous female iPSC-CMs express dystrophin. iPSC-CMs from  
829 hemizygous dystrophic cell lines (Male 1 and Male 2) did not express the large dystrophin  
830 isoform. Top left, control tissue lysates from a normal individual and a patient with Becker  
831 MD. Dystrophic left ventricular tissue did express dystrophin, but to a lesser extent than

832 normal left ventricle tissue. These data were generously provided by the Hypertrophic  
833 Cardiomyopathy Clinic, University of Michigan. **(b)** Quantitation of dystrophin in control  
834 and heterozygous female iPSC-CMs. Dystrophin was absent in DMD iPSC-CMs  
835 ( $***P = 0.0001$ ) compared to control iPSC-CMs. Heterozygous female cells exhibited  
836 nearly normal dystrophin expression ( $P = 0.5864$ ). Protein concentration confirmed by  
837 Western blot against troponin T. Two-tailed Mann-Whitney test. Errors bars, SEM. The  
838  $n$ -values are in parentheses. **(c–e)** iPSC-CMs plated onto Matrigel-coated  
839 micropatterned PDMS. **(c)** Male 1 iPSC-CMs plated as a monolayer on a Matrigel-coated  
840 PDMS (left) for 1 week, and then dissociated for re-plating onto micropatterned PDMS  
841 (right). **(d)** Control iPSC-CMs fixed and stained on micropatterns. Immunostaining for  
842 cardiac troponin I (red) and F-actin (green). Nuclei were stained with DAPI (white arrows).  
843 Scale bar, 50  $\mu\text{m}$ . **(e)** Immunostaining for dystrophin in iPSC-CMs from control, dystrophic  
844 Male 1 and Male 2, female, and mature mouse cardiomyocytes. DMD cells do not express  
845 dystrophin compared to control. Heterozygous female iPSC-CMs showed variable  
846 expression of dystrophin. Scale bar, 10  $\mu\text{m}$ .  
847

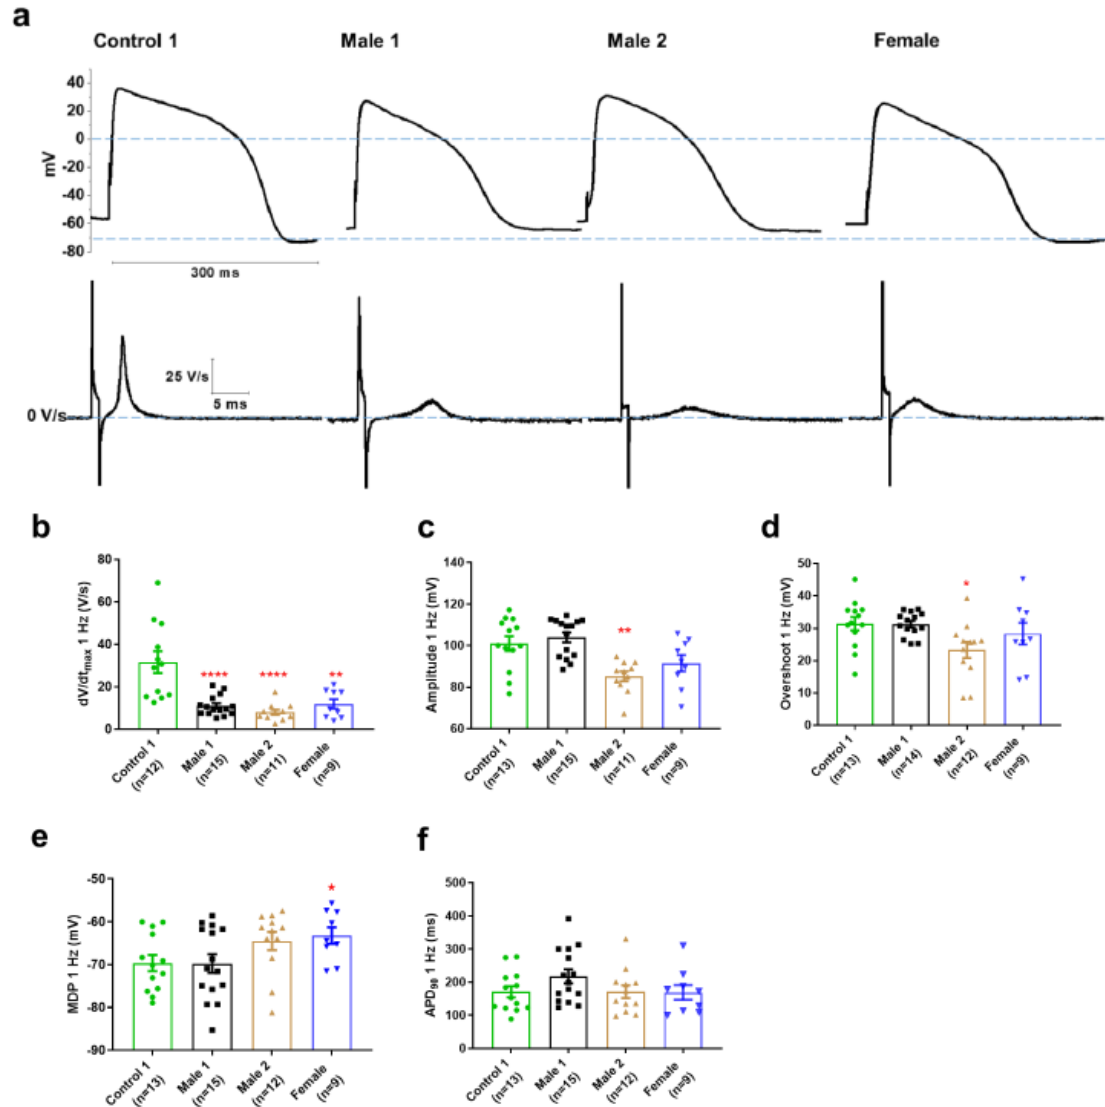

848

849 **Figure 3. Action potential properties in control, DMD, and female iPSC-CMs.** (a)  
 850 Representative action potentials of ventricular-like iPSC-cardiomyocytes from Control 1,  
 851 heterozygous female and DMD individuals. The respective dV/dt trace is shown below  
 852 each action potential. (b) Mann-Whitney test revealed that dV/dt<sub>max</sub> was reduced in both  
 853 DMD compared to Control 1. dV/dt<sub>max</sub> was also significantly reduced in the female cells.  
 854 (c–e) Overshoot and Amplitude were only affected in the Male 2 iPSC-CMs, while  
 855 heterozygous female cells were significantly more depolarized compared to control. (f)  
 856 APD<sub>90</sub> was similar in all iPSC-CMs tested. Cells plated on micropatterns were paced at 1  
 857 Hz. Errors bars, SEM. The n-values are in parentheses. Two-tailed Mann-Whitney test.  
 858 \*\*\*\**P* = 0.0001 and \**P* < 0.05.



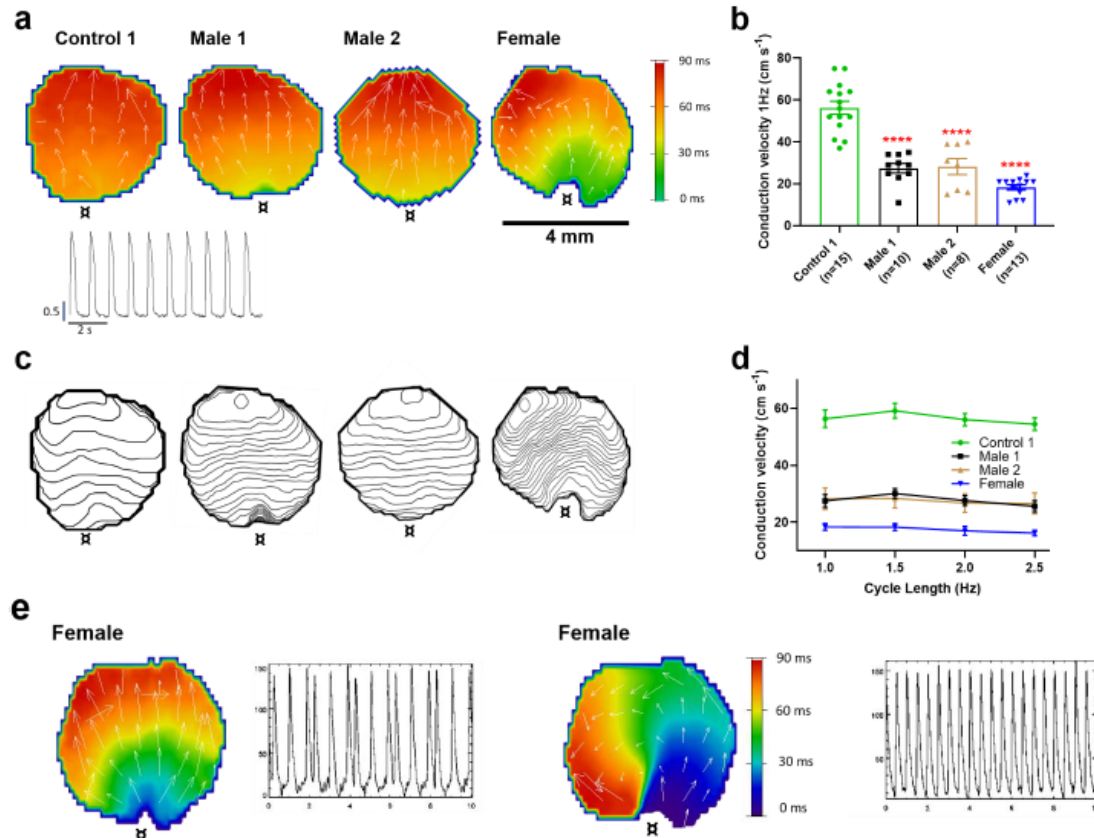

859  
 860 **Figure 4. Conduction velocity is slower in iPSC-CM monolayers from DMD**  
 861 **hemizygous male and heterozygous female than control. (a)** Activation maps of  
 862 action potential propagation at 1 Hz. Each color represents a different activation time with  
 863 time zero appearing in green (♠ indicates the location of the stimuli for each monolayer).  
 864 White vectors (↑) are a measure of local velocity and direction of the wave. *Inset.*  
 865 Representative optical APs at 1 Hz. **(b)** Bar graphs of CV in each monolayer group, as  
 866 indicated. Numbers in parenthesis are number of monolayers per group. **(c)** Averaged 2-  
 867 ms contour isochrone maps for each representative monolayer above. Tighter averaged  
 868 isochrone contours in the hemizygous and heterozygous iPSC-CM monolayers indicate  
 869 slowed and more heterogeneous CV compared to control. **(d)** CV restitution tended to  
 870 slow in all groups as pacing frequency increased. **(e)** Arrhythmias in heterozygous female  
 871 iPSC-CMs monolayers (see also *Suppl. Videos*). Left map, spontaneous pacemaker  
 872 activity; *Left inset*, single pixel recording reveals premature ectopic discharges in a pattern  
 873 of trigeminy; Right map, high-frequency reentrant tachycardia maintained by a self-  
 874 sustaining rotor; *Right inset*, single pixel recording shows the interbeat interval (500 ms)  
 875 of the reentrant tachycardia. Errors bars represent SEM. The *n*-values are in parentheses.  
 876 Two-tailed Mann-Whitney test. \*\*\*\**P* < 0.0001.

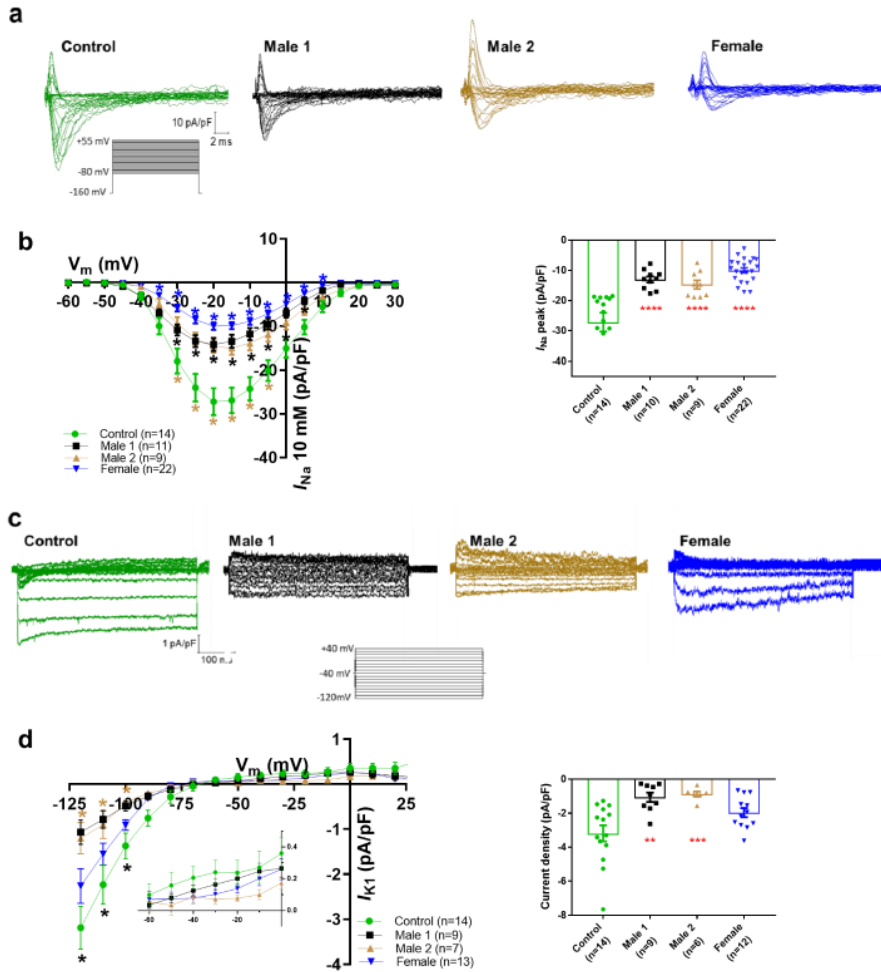

877  
 878 **Figure 5. Sodium ( $I_{Na}$ ) and Inward rectifier potassium ( $I_{K1}$ ) channel properties in**  
 879 **control, DMD, and female iPSC-cardiomyocytes. (a)** Superimposed  $I_{Na}$  current traces  
 880 for Control 1, hemizygous and heterozygous iPSC-CMs elicited by the pulse protocol  
 881 shown by the inset. **(b) Left**, normalized current-voltage ( $I/V$ ) relationships.  $I_{Na}$  was  
 882 significantly reduced in both Male 1 and Male 2 iPSC-CMs compared with control at the  
 883 specified voltages. Heterozygous female iPSC-CMs showed also a very reduced current  
 884 density from 35 to 10 mV. Two-way analysis of variance (ANOVA) followed by Sidak's  
 885 multiple comparisons test. **Right**, peak  $I_{Na}$  density at 20 mV was reduced in all three  
 886 affected groups compared to control. **(c)** Typical  $I_{K1}$  density traces from control and DMD  
 887 cells elicited by the pulse protocol in the *inset*. **(d) Left**,  $I/V$  relationships.  $I_{K1}$  was  
 888 significantly reduced in both Male 1 and Male 2 iPSC-CMs compared with control at the  
 889 specified voltages. Two-way ANOVA followed by Sidak's multiple comparisons. **Right**,  
 890 normalized current densities at -120 mV.  $I_{K1}$  was decreased in Male 1 and in Male 2 cells  
 891 compared to control cells. Two-tailed Mann-Whitney test. Errors bars represent SEM. The  
 892  $n$ -values are in parentheses. \*\*\*\* $P < 0.0001$ , \*\* $P < 0.005$  and \* $P < 0.05$  and \* $P < 0.056$ .  
 893

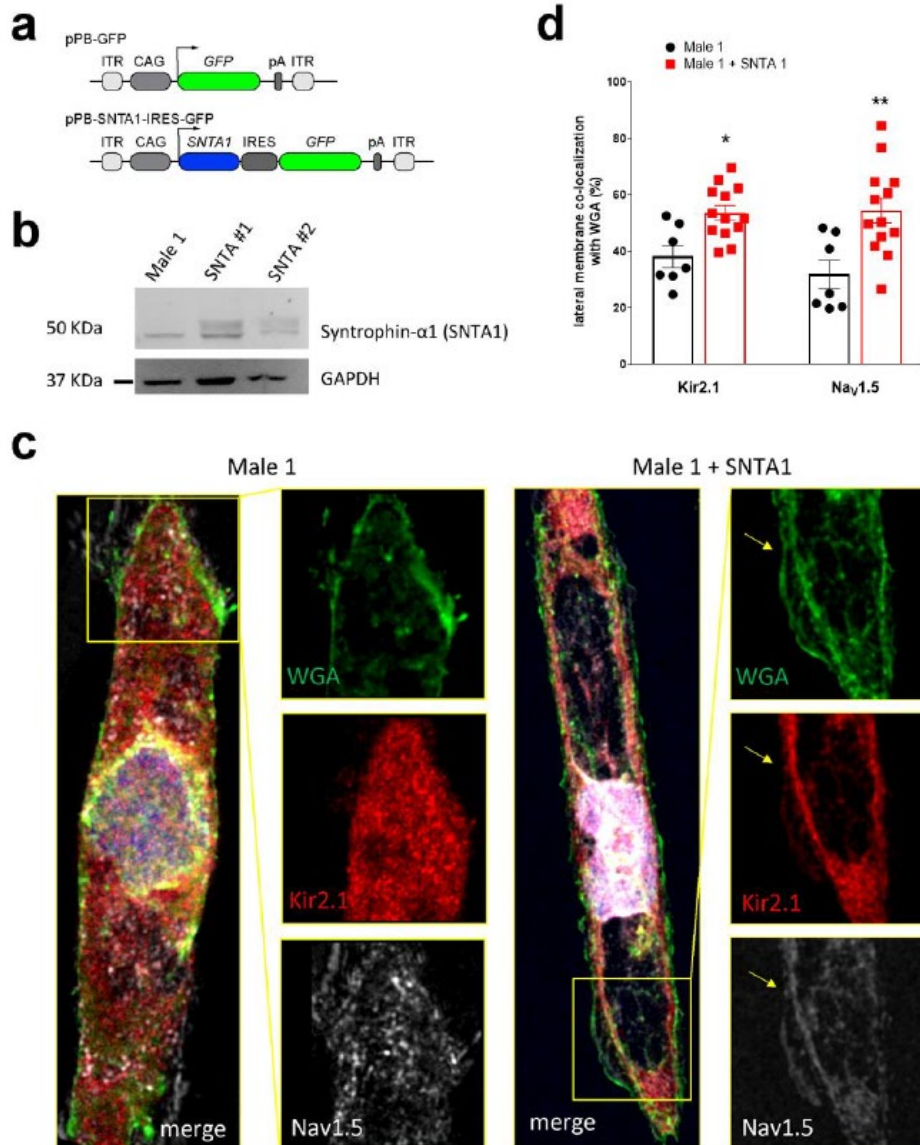

894  
 895 **Figure 6. Transfection of *SNTA1* rescues membrane levels of Kir2.1 and Nav1.5**  
 896 **proteins in iPSC-CMs from Male 1 Patient. (a)** Cartoon illustrating non-viral piggy-bac  
 897 vector encoding *SNTA1* for transfection in Male 1 iPSC-CMs. *SNTA1* coding region  
 898 (CDS) is driven by the CAG promoter and followed by green fluorescence protein (GFP)  
 899 after an internal ribosome entry site (IRES). Control vector only expresses GFP. **(b)**  
 900 Western blot for α-1-Syntrophin expression normalized with GAPDH. **(c)** Immunostaining  
 901 for Kir2.1 (red), Nav1.5 (white) and WGA (green) in control Male 1 iPSC-CM (left) and  
 902 Male 1 iPSC-CM transfected with *SNTA1*. Nuclei were stained with DAPI. Yellow arrows  
 903 point to iPSC-CM membrane staining. Scale bar, 5 μm. **(d)** Quantification of Kir2.1 and  
 904 Nav1.5 colocalization with WGA at the cell membrane shows significant increase of both  
 905 Kir2.1 (\* $P < 0.05$ ;  $n = 7-10$  cells) and Nav1.5 (\*\* $P < 0.01$ ;  $n = 7-10$  cells).

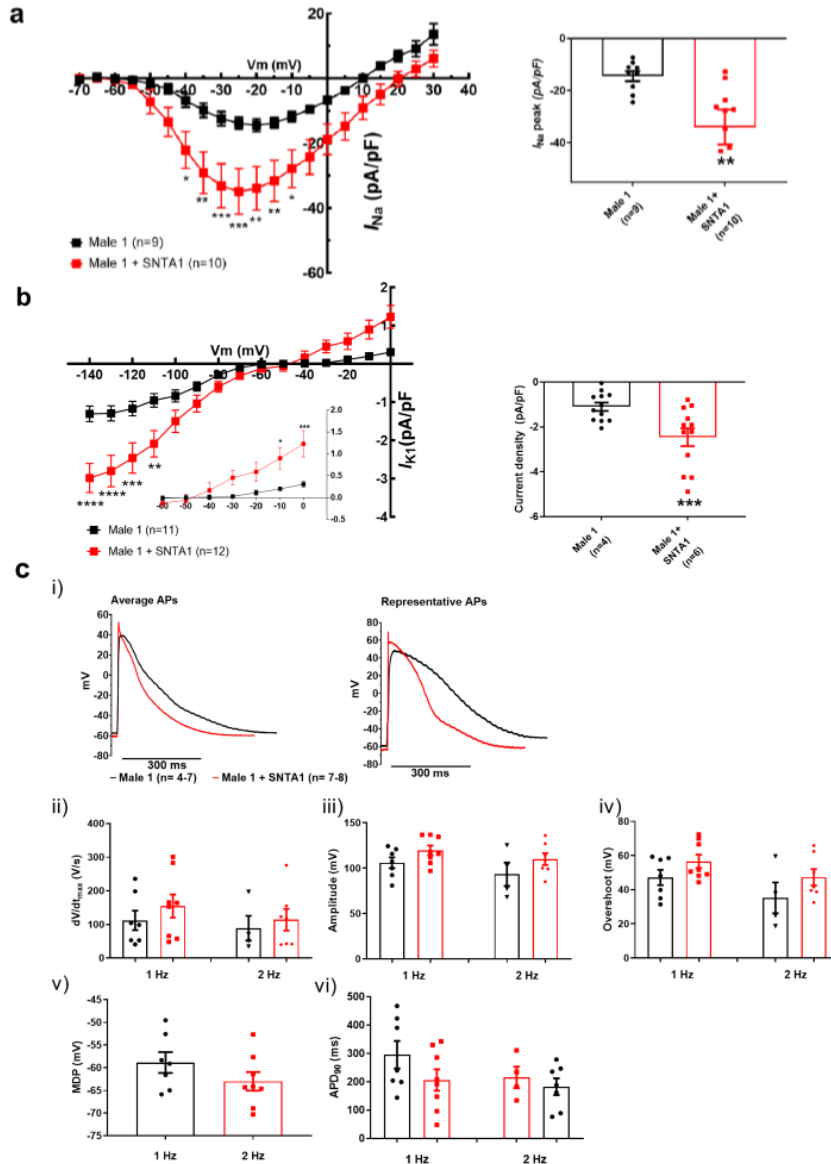

906

907

908

909

910

911

912

913

914

915

916

917

918

**Figure 7. SNTA1 expression restores the electrophysiological deficiencies in DMD iPSC-CMs.** (a–b) Normalized current-voltage ( $I/V$ ) relationships for  $I_{Na}$  and  $I_{K1}$  in Male 1 before (black) and after (red) syntrophin expression at the specified voltages. Two-way analysis of variance (ANOVA) followed by Sidak's multiple comparisons test. Graphs show peak  $I_{Na}$  density at -20 mV (a) and peak  $I_{K1}$  density at -120 mV (b). The inset in B highlights the increased outward component of  $I_{K1}$  at less negative potentials upon syntrophin expression. Two-tailed Mann-Whitney test. (c) Effect of syntrophin expression on AP showing: i) Averaged (left) and representative (right) action potential traces of ventricular-like iPSC-cardiomyocytes derived from DMD cells before (black) and after (red) syntrophin expression, ii) maximal AP upstroke velocity ( $dV/dt_{max}$ ), iii) Amplitude, iv) Overshoot, v) MDP and vi)  $APD_{90}$ . Errors bars represent SEM. The  $n$ -values are in parentheses. \* $P < 0.05$ ; \*\* $P < 0.01$ ; and \*\*\* $P < 0.001$ .

## **SUPPLEMENTARY DATA**

### ***SNTA1 Gene Rescues Ion Channel Function in iPSC-CMs from Muscular Dystrophy Patients with Cardiomyopathy and Arrhythmias***

919

920 Eric N Jimenez-Vazquez, PhD<sup>1</sup>, Michael Arad, MD<sup>4</sup>, Álvaro Macías, PhD<sup>2</sup>, Maria  
921 Linarejos Vera-Pedrosa, MS<sup>2</sup>, Francisco M. Cruz-Uréndez, PhD,<sup>2</sup> Ashley J Cuttitta, MS<sup>3</sup>,  
922 André Monteiro Da Rocha, PhD<sup>1</sup>, Todd J Herron PhD<sup>1</sup>, Daniela Ponce-Balbuena, PhD<sup>1</sup>,  
923 Guadalupe Guerrero-Serna, PhD<sup>1</sup>, Ofer Binah, PhD<sup>5</sup>, Daniel E Michele PhD<sup>3</sup>, and José  
924 Jalife, MD, PhD,<sup>1,2,3\*</sup>.

925

926 <sup>1</sup>Department of Internal Medicine and Molecular and Integrative Physiology, Center for  
927 Arrhythmia Research, University of Michigan, Ann Arbor, MI, USA.

928 <sup>2</sup>Centro Nacional de Investigaciones Cardiovasculares (CNIC) Carlos III, Madrid, Spain,  
929 and Centro de Investigación Biomédica en Red de Enfermedades Cardiovasculares  
930 (CIBERCV), Madrid, Spain

931 <sup>3</sup>Department of Molecular and Integrative Physiology, University of Michigan Medical  
932 School, Ann Arbor, MI, USA.

933 <sup>4</sup>Leviev Heart Center, Sheba Medical Center, Tel Hashomer, and Tel Aviv University,  
934 Israel.

935 <sup>5</sup>Department of Physiology, Biophysics and Systems Biology, Ruth and Bruce Rappaport  
936 Faculty of Medicine, Technion - Israel Institute of Technology, Haifa, Israel.

937

938

939

## Supplementary Figures

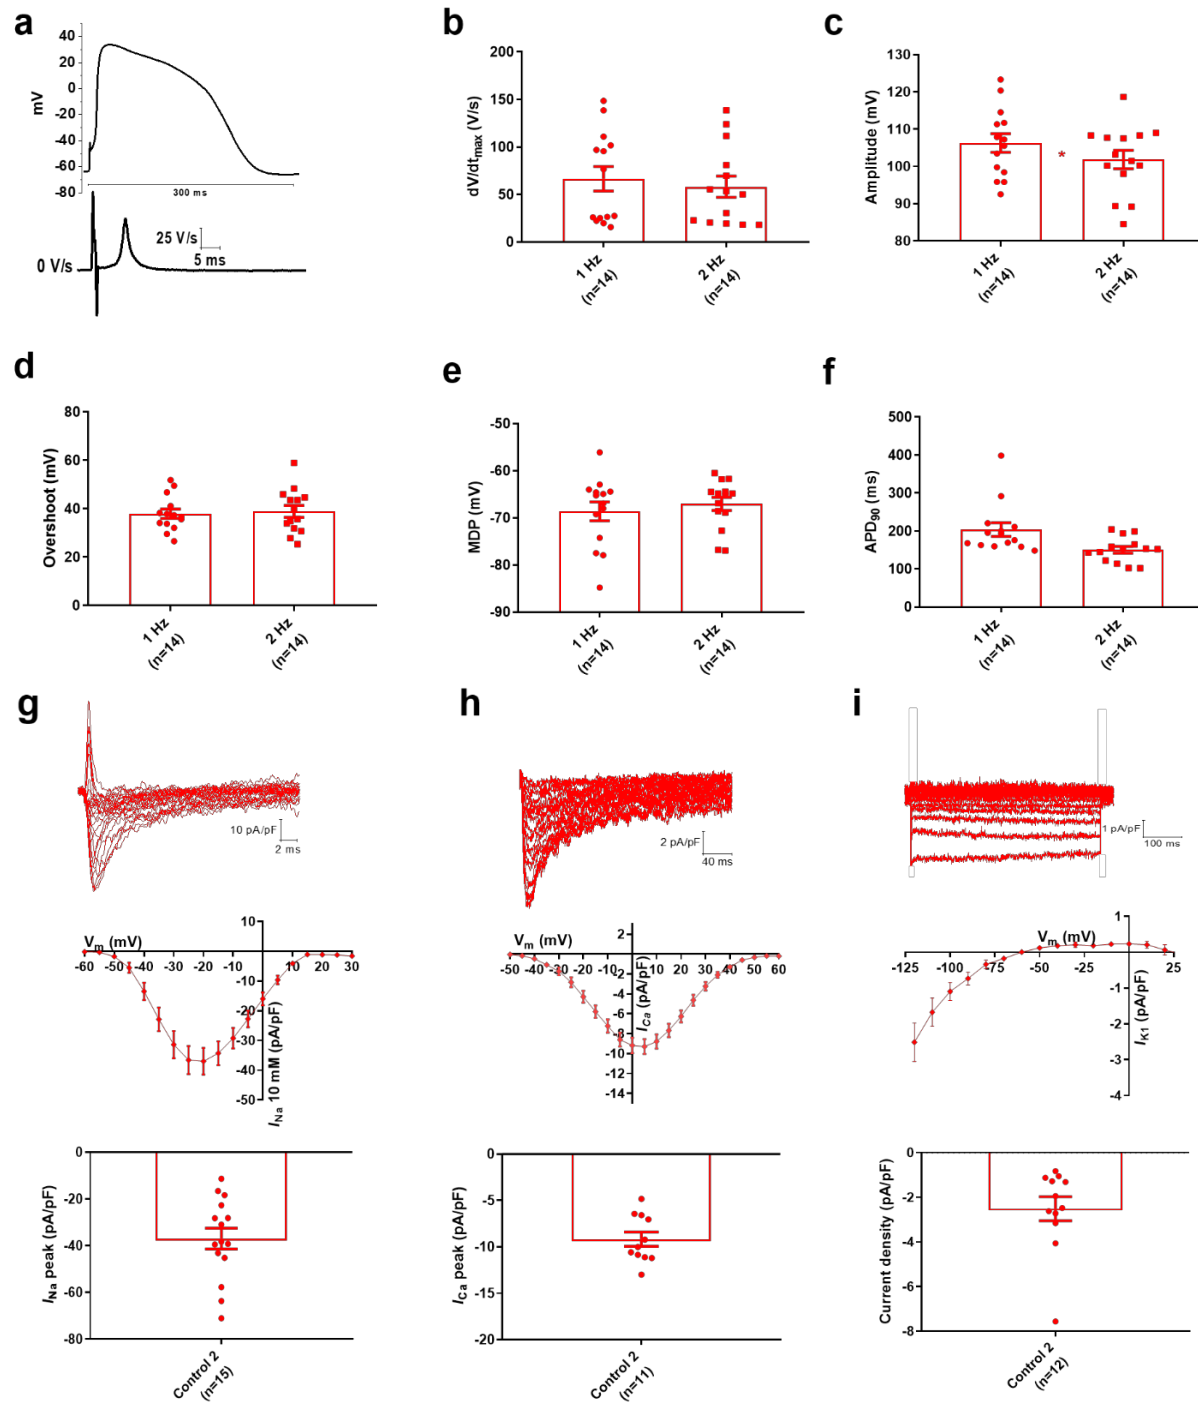

**Supplemental Fig. 1. Electrophysiological analysis in Control 2 (human foreskin-derived BJ iPSC-CMs).** (a) Representative AP trace of ventricular-like control BJ iPSC-CMs obtained at 1 Hz of pacing. *Inset*. First derivative with respect to time ( $dV/dt$ ). (b-f) Action potential properties. Recordings at 1 and 2 Hz were similar to those obtained from the healthy donor patient derived-iPSC-CMs (Control 1). (g-i) Current traces, I/V curves, and normalized current densities for  $Nav1.5$ ,  $Ca_v1.2$ , and  $Kir2.1$  ion channels, respectively. Data obtained from the control BJ iPSC-CMs (Control 2) were similar to the other control iPSC-CMs.



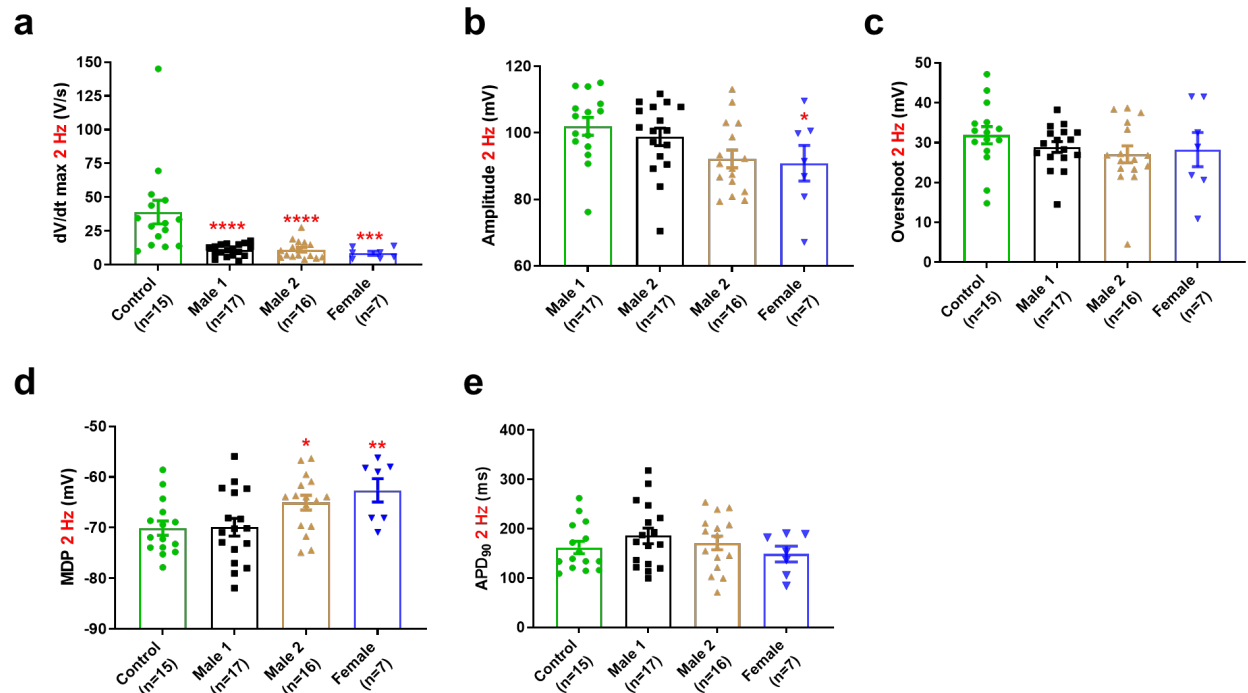

940 **Supplemental Fig. 2. Action potential properties of control, hemizygous and heterozygous DMD**  
 941 **iPSC-CMs paced at 2 Hz. (a)** Maximal AP upstroke velocity was reduced in both hemizygous  
 942 ( $****P < 0.0001$ ), and the heterozygous female ( $***P = 0.0002$ ) iPSC-CMs compared to control. **(b–d)**  
 943 Overshoot values were similar among all tested groups ( $P = 0.2413$  for Male 1 cells,  $P = 0.1121$  for Male 2  
 944 cells, and  $P = 0.4115$  for *female* cells). Amplitude and MDP were statistically significant affected in the Male  
 945 2 iPSC-CMs ( $*P = 0.0109$  and  $*P = 0.0267$ , respectively) compared to control, while the heterozygous  
 946 iPSC-CMs showed a more depolarized RMP ( $**P = 0.0081$ ). **(e)**  $APD_{90}$  was similar in all tested iPSC-CMs  
 947 ( $P = 0.3699$ ,  $P = 0.5196$ , and  $P = 0.8366$  for Male 1, Male 2, and heterozygous iPSC-CMs, respectively).  
 948 Cells plated on micropatterns were paced at 2 Hz. Two-tailed Mann-Whitney test. Errors bars represent  
 949 s.e.m. The  $n$ -values are in parentheses.



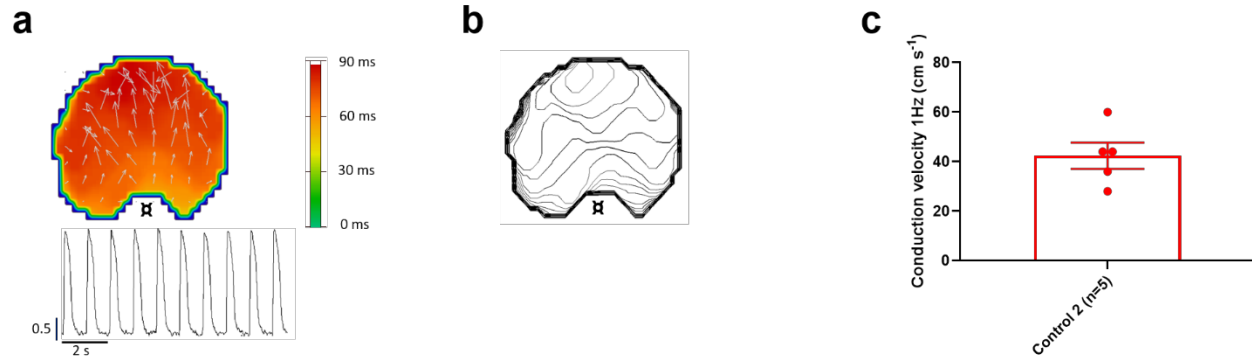

950 **Supplemental Fig. 3. Conduction velocity in control BJ iPSC-CM (Control 2) monolayer.** (a) Activation  
951 maps of action potential propagation at 1 Hz. Each color represents a different activation time with time  
952 zero appearing in green (■ indicates the location of the stimuli for each monolayer). White vectors (↑) are  
953 a measure of local velocity and direction of the wave. *Inset*. Representative optical APs evoked by external  
954 stimulation at 1 Hz. (b) Averaged 2-s contour isochrone maps for the representative monolayer in A. (c)  
955 Bar graph of conduction velocity in the additional control BJ monolayers. Errors bars represent SEM. The  
956 *n*-values are in parentheses.

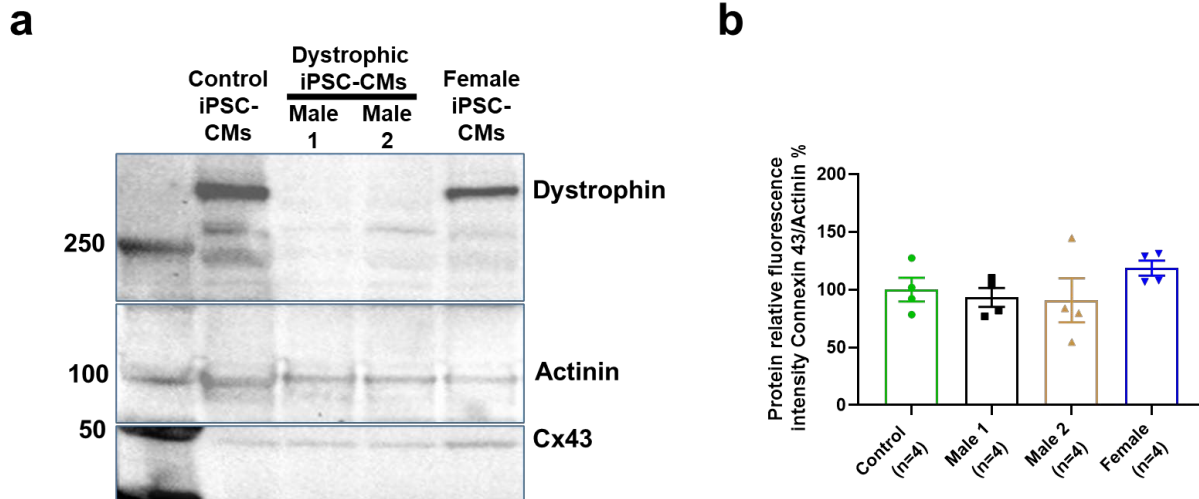

957 **Supplemental Fig. 4. Cx43 expression level in control, hemizygous and heterozygous DMD iPSC-**  
958 **CMs. (a)** Typical Western blot for connexin43 expression. About 50k cells were collected to quantify total  
959 dystrophin, connexin43 and actinin levels in iPSC-CMs. **(b)** Scatter plots of Cx43 detected in control,  
960 hemizygous and heterozygous DMD iPSC-CMs. Cx43 protein levels normalized to actinin (loading control)  
961 resulted to be similar in all tested groups ( $P = 0.8857$  for Male 1,  $P = 0.6857$  for Male 2, and  $P = 0.1143$  for  
962 female iPSC-CMs). Two-tailed Mann-Whitney test. Errors bars represent s.e.m. The  $n$ -values are indicated  
963 in parentheses after the name of each group.

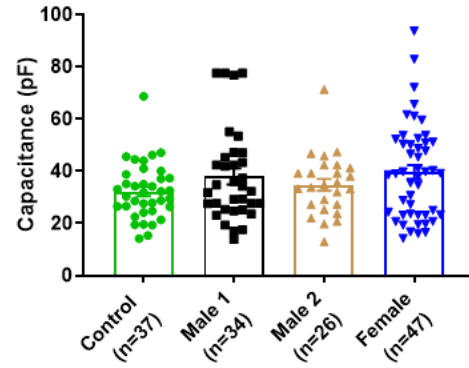

964 **Supplemental Fig. 5. Cell capacitance.** No statistically significant differences in size were observed  
965 among control ( $32 \pm 2$  pF), female ( $39 \pm 3$  pF;  $P = 0.0715$ ) and DMD iPSC-CMs ( $38 \pm 3$  pF,  $P = 0.3257$  for  
966 Male 1; and  $35 \pm 2$  pF,  $P = 0.3703$  for Male 2 iPSC-CMs). Two-tailed Mann-Whitney test. Errors bars  
967 represent s.e.m. The  $n$ -values are indicated in parentheses after the name of each group.

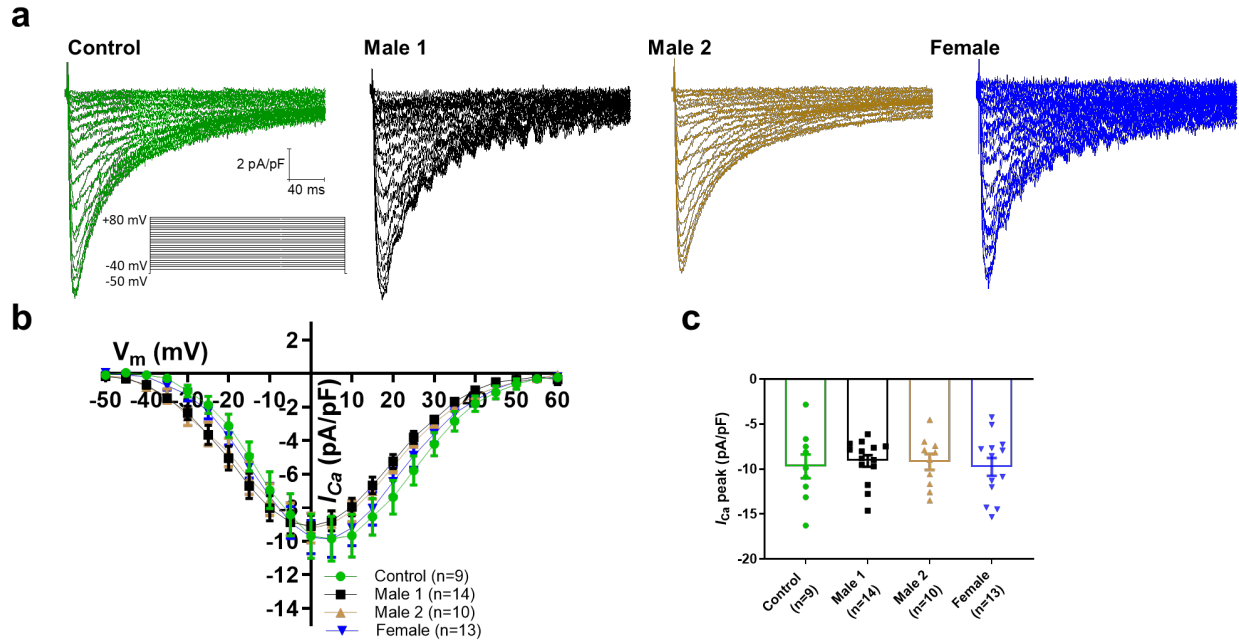

968 **Supplemental Fig. 6. Calcium channel properties in control, DMD and female iPSC-CMs.** (a) Original  
969 calcium current traces obtained from all iPSC-CMs elicited by depolarizing potential as shown in the *inset*.  
970 (b) Current-voltage relationships showing no significant differences among all tested groups. Two-way  
971 ANOVA followed by Sidak's multiple comparisons. (c) Comparison of normalized current densities from all  
972 iPSC-CMs groups. The current values at 0 mV were similar in all analyzed cells ( $P = 0.5571$  for Male 1,  $P$   
973  $= 0.8421$  for Male 2, and  $P > 0.9999$  for female iPSC-CMs). Two-tailed Mann-Whitney test. Errors bars  
974 represent s.e.m. The  $n$ -values are indicated in parentheses after the name of each group.

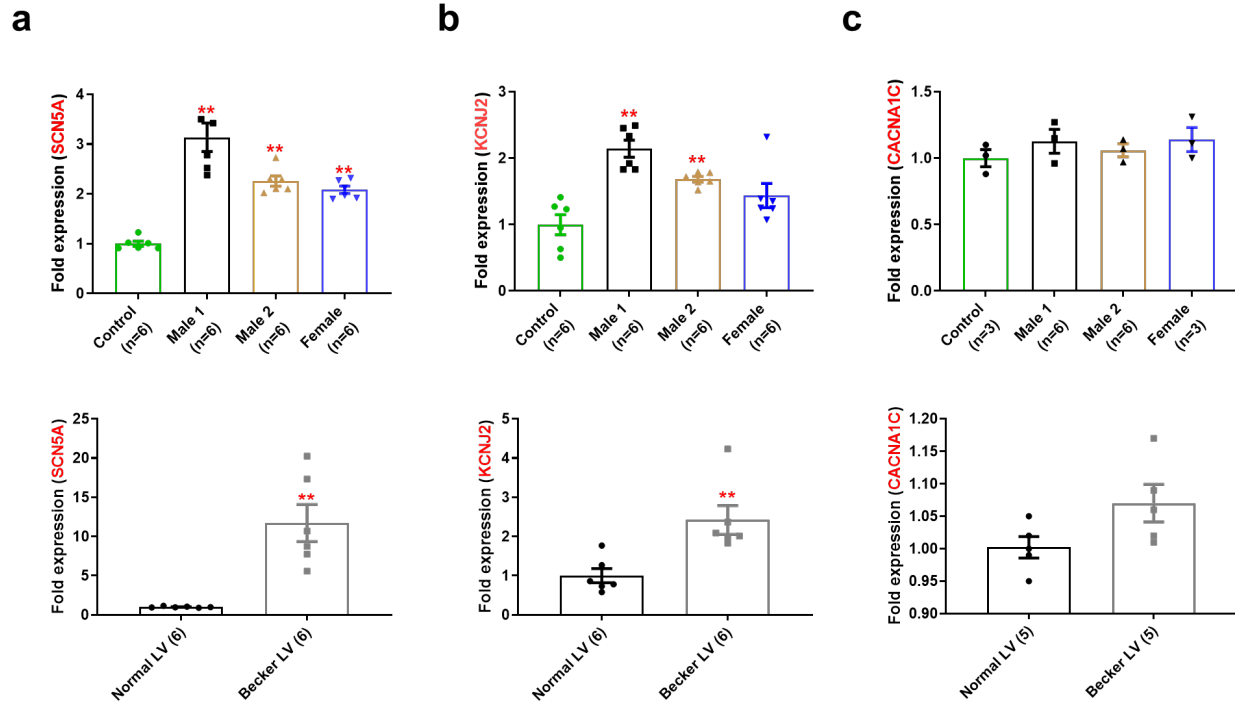

975 **Supplemental Fig. 7. *SCN5A*, *KCNJ2* and *CACNA1C* mRNA expression in control, DMD, and female**  
976 **iPSC-CMs. (a) *SCN5A* mRNA expression was increased in iPSC-CMs from hemizygous and heterozygous**  
977 **DMD individuals (top), as well as in the human left ventricle heart tissue from a Becker MD individual**  
978 **compared to a healthy subject (bottom). (b) *KCNJ2* mRNA levels were higher in both hemizygous and**  
979 **heterozygous iPSC-CMs (top), like those found in human left ventricle heart tissue from Becker DM patients**  
980 **(bottom) when compared to the corresponding control. (c) *CACNA1C* mRNA expression was not significant**  
981 **different among tested groups from either iPSC-CMs (top) or left ventricle tissues (bottom). mRNA levels**  
982 **were determined by qRT-PCR and calculated by the comparative Ct method ( $2^{-\Delta\Delta C_t}$ ) normalized to the**  
983 **internal control 18s rRNA. Errors bars represent SEM. The *n*-values are in parentheses. Two-tailed Mann-**  
984 **Whitney test. \*\**P* < 0.005.**

985

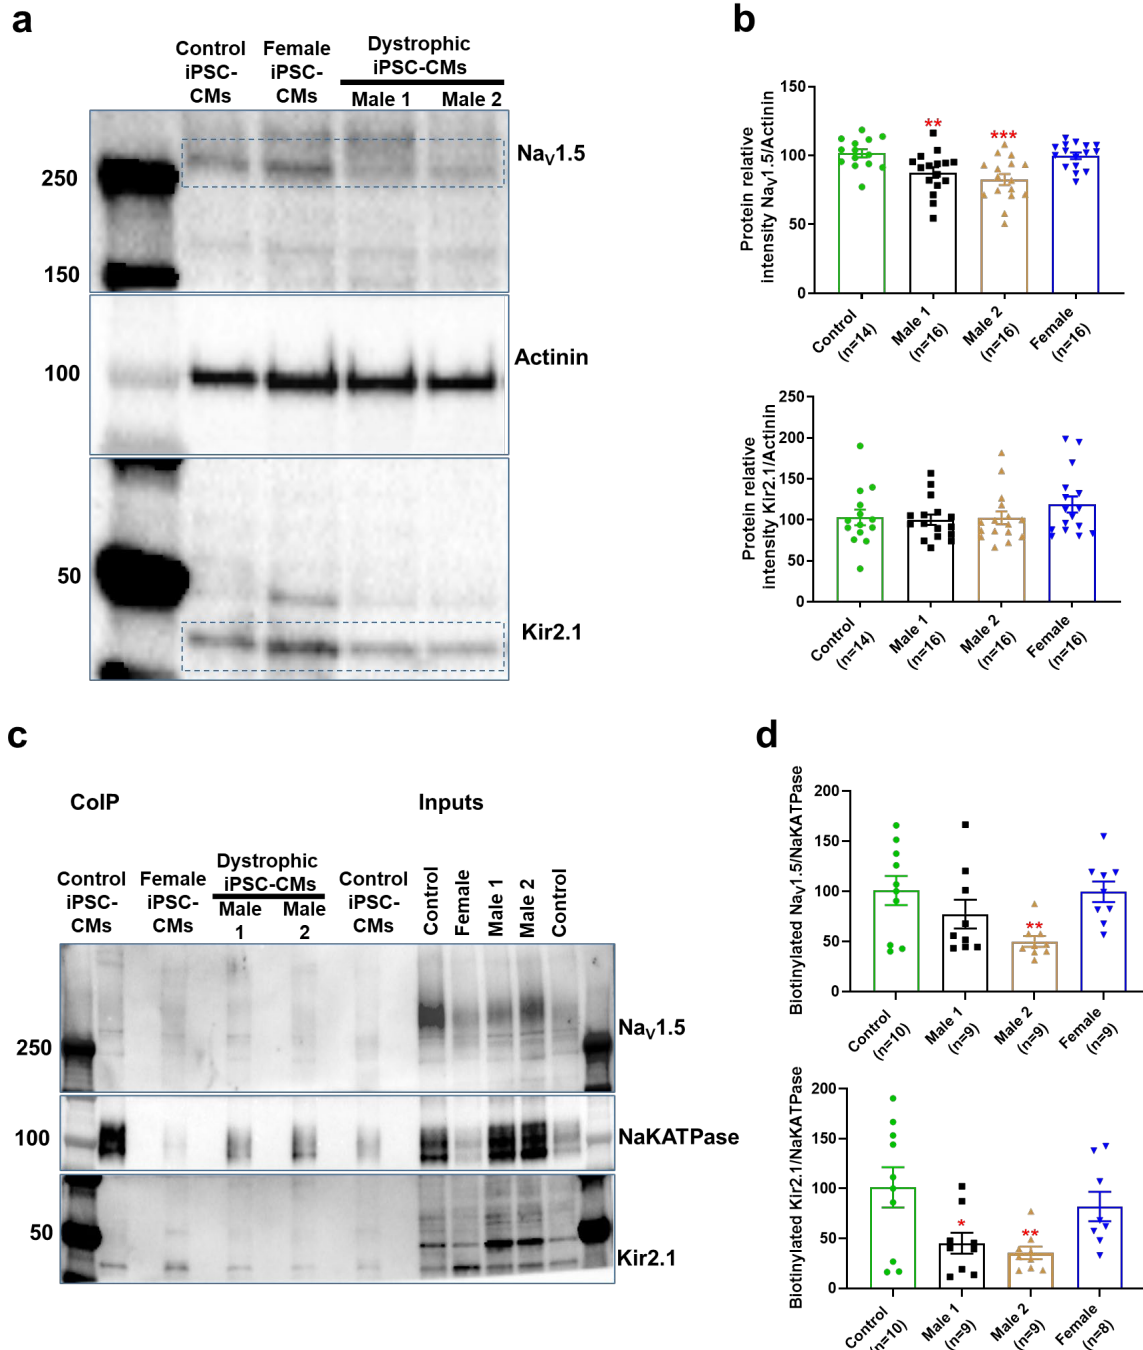

987 **Supplemental Figure 8. Nav<sub>v</sub>1.5 protein level is significantly reduced in patient-specific DMD iPSC-**  
 988 **CMs. (a)** Representative Western blot for each antibody used. The bands within the blue rectangles at ~250  
 989 KDa and below 50 KDa correspond to Nav<sub>v</sub>1.5 and Kir2.1, respectively. About 50K cells were collected to  
 990 quantify total Nav<sub>v</sub>1.5, Kir2.1 and actinin levels in control, heterozygous and hemizygous DMD cells. **(b)**  
 991 Scatter plots of Nav<sub>v</sub>1.5 and Kir2.1 detected in control, *female* and DMD iPSC-CMs. Nav<sub>v</sub>1.5 and Kir2.1  
 992 protein levels were normalized to actinin (loading control). **(c)** Representative Western blot after  
 993 biotinylation and protein precipitation with streptavidin magnetic beads. **(d)** Scatter plots of biotinylated  
 994 Nav<sub>v</sub>1.5 and Kir2.1 from control, *female*, and DMD iPSC-CMs. Fifty μg of biotinylated protein was loaded.  
 995 Errors bars represent SEM. The *n*-values are in parentheses. Two-tailed Mann-Whitney test. \*\*\**P* < 0.001,  
 996 \*\**P* < 0.01, and \**P* < 0.05  
 997



## Supplementary Tables

998 **Supplemental Table 1.** Action potential parameters of iPSC-CMs paced at 1 and 2 Hz.

| Group       | dV/dt <sub>max</sub> | Overshoot | Amplitude | MDP       | APD <sub>90</sub> | n  |
|-------------|----------------------|-----------|-----------|-----------|-------------------|----|
| <b>1 Hz</b> |                      |           |           |           |                   |    |
| Control 1   | 32 ± 5               | 31 ± 2    | 101 ± 3   | -70 ± 2   | 171 ± 17          | 13 |
| Male 2      | 8 ± 1*               | 23 ± 2*   | 85 ± 2*   | -64 ± 2   | 171 ± 19          | 12 |
| Male 1      | 11 ± 1*              | 31 ± 1    | 103 ± 2   | -70 ± 2   | 218 ± 21          | 15 |
| Female      | 12 ± 2               | 28 ± 3    | 92 ± 4    | -63 ± 2*  | 169 ± 22          | 9  |
| <b>2 Hz</b> |                      |           |           |           |                   |    |
| Control 1   | 39 ± 9               | 32 ± 2    | 102 ± 3   | -70 ± 1   | 162 ± 12          | 15 |
| Male 2      | 11 ± 2****           | 27 ± 2    | 92 ± 3*   | -65 ± 1*  | 171 ± 14          | 16 |
| Male 1      | 11 ± 1****           | 29 ± 1    | 99 ± 3    | -70 ± 2   | 186 ± 16          | 17 |
| Female      | 9 ± 1***             | 28 ± 4    | 91 ± 5    | -63 ± 2** | 149 ± 16          | 7  |

999 One-way ANOVA followed by Dunnett's multiple comparisons test. Values are expressed as mean ± SEM.

1000 \*\*\*\**P* < 0.0001, \*\*\**P* = 0.0002, \*\**P* = 0.0081, and \**P* < 0.05

1001 **Supplemental Table 2.** Action potential parameters of iPSC-CMs paced at 1 and 2 Hz.  
1002

| Group       | dV/dt <sub>max</sub> | Overshoot  | Amplitude | MDP     | APD <sub>90</sub> | n  |
|-------------|----------------------|------------|-----------|---------|-------------------|----|
| <b>1 Hz</b> |                      |            |           |         |                   |    |
| Control 2   | 66 ± 12              | 38 ± 2     | 106 ± 2   | -69 ± 2 | 204 ± 18          | 14 |
| Male 2      | 9.6 ± 2***           | 23 ± 2**** | 88 ± 3*** | -64 ± 2 | 171 ± 19          | 12 |
| Male 1      | 11 ± 1****           | 32 ± 1     | 103 ± 2   | -70 ± 2 | 218 ± 21          | 15 |
| Female      | 12 ± 2***            | 28 ± 3*    | 92 ± 4**  | -63 ± 2 | 169 ± 22          | 9  |
| <b>2 Hz</b> |                      |            |           |         |                   |    |
| Control 2   | 58 ± 11              | 39 ± 2     | 102 ± 2   | -67 ± 1 | 150 ± 9           | 14 |
| Male 2      | 11 ± 2****           | 27 ± 2**   | 92 ± 3    | -65 ± 1 | 171 ± 14          | 16 |
| Male 1      | 11 ± 1****           | 29 ± 1**   | 99 ± 3    | -70 ± 2 | 186 ± 16          | 17 |
| Female      | 9 ± 1***             | 28 ± 4*    | 91 ± 5    | -63 ± 2 | 149 ± 16          | 7  |

1003 One-way ANOVA followed by Dunnett's multiple comparisons test. Values are expressed as mean ± SEM.

1004 \*\*\*\**P* < 0.0001, \*\*\**P* < 0.0007, \*\**P* < 0.0089, and \**P* < 0.05.

1005

1006

1007

1008

1009 **Supplemental Table 3.** Action potential parameters of iPSC-CMs at 1 and 2 Hz, Control 1 vs Control 2.

| Group       | dV/dt <sub>max</sub> | Overshoot | Amplitude | MDP     | APD <sub>90</sub> | n  |
|-------------|----------------------|-----------|-----------|---------|-------------------|----|
| <b>1 Hz</b> |                      |           |           |         |                   |    |
| Control 1   | 44 ± 13              | 31 ± 2    | 101 ± 3   | -70 ± 2 | 171 ± 17          | 13 |
| Control 2   | 66 ± 12              | 38 ± 2    | 106 ± 2   | -69 ± 2 | 204 ± 18          | 14 |
| <b>2 Hz</b> |                      |           |           |         |                   |    |
| Control 1   | 39 ± 9               | 32 ± 2    | 102 ± 3   | -70 ± 1 | 162 ± 12          | 15 |
| Control 2   | 58 ± 11              | 39 ± 2    | 102 ± 2   | -67 ± 1 | 150 ± 9           | 14 |

1010 One-way ANOVA followed by Dunnett's multiple comparisons test. Values are expressed as mean ± SEM.

1011

1012

1013 **Supplemental Table 4.** Biophysical parameters of DMD, and female iPSC-CMs vs Control 1.

| <b>Activation</b>               |                 |       |                  |                      |    |
|---------------------------------|-----------------|-------|------------------|----------------------|----|
|                                 | V <sub>50</sub> | k     | V <sub>rev</sub> | Peak current density | n  |
| <b>Na<sup>+</sup> currents</b>  | mV              | mV    | mV               | pA/pF                |    |
| Control 1                       | -29 ± 1         | 3 ± 1 | 17 ± 1           | -27 ± 3              | 14 |
| Male 1                          | -31 ± 1         | 4 ± 1 | 16 ± 1           | -14 ± 1****          | 11 |
| Male 2                          | -28 ± 1         | 3 ± 1 | 17 ± 2           | -15 ± 1****          | 9  |
| Female                          | -27 ± 1         | 4 ± 1 | 14 ± 1           | -11 ± 1****          | 22 |
| <b>Ca<sup>2+</sup> currents</b> |                 |       |                  |                      |    |
| Control 1                       | - 8 ± 1         | 8 ± 1 | 54 ± 3           | -10 ± 1              | 9  |
| Male 1                          | -16 ± 1         | 8 ± 1 | 54 ± 2           | - 9 ± 1              | 14 |
| Male 2                          | -14 ± 1         | 9 ± 1 | 57 ± 1           | - 9 ± 1              | 10 |
| Female                          | -12 ± 1         | 7 ± 1 | 54 ± 2           | -10 ± 1              | 13 |

1014 Activation parameters were calculated by data fitting to Boltzmann functions. V<sub>50</sub> is the voltage for  
 1015 half-maximal activation, k is the slope factor and n the number of cells. One-way ANOVA followed by  
 1016 Dunnett's multiple comparisons test. Values are expressed as mean ± s.e.m. \*\*\*\*P < 0.0001.

1017

1018

1019

1020

1021

1022

1023

1024

1025

1026

1027 **Supplemental Table 5.** Biophysical parameters of DMD, and female iPSC-CMs vs Control 2.

| <b>Activation</b>               |                       |          |                        |                             |          |
|---------------------------------|-----------------------|----------|------------------------|-----------------------------|----------|
|                                 | <b>V<sub>50</sub></b> | <b>k</b> | <b>V<sub>rev</sub></b> | <b>Peak current density</b> | <b>n</b> |
| <b>Na<sup>+</sup> currents</b>  | mV                    | mV       | mV                     | pA/pF                       |          |
| Control 2                       | -34 ± 1               | 4 ± 1    | 15 ± 1                 | -38 ± 1                     | 15       |
| Male 1                          | -31 ± 1               | 4 ± 1    | 16 ± 1                 | -13 ± 1****                 | 11       |
| Male 2                          | -28 ± 1               | 3 ± 1    | 17 ± 2                 | -15 ± 1****                 | 9        |
| Female                          | -27 ± 1               | 4 ± 1    | 14 ± 1                 | -11 ± 1****                 | 22       |
| <b>Ca<sup>2+</sup> currents</b> |                       |          |                        |                             |          |
| Control 2                       | -11 ± 1               | 8 ± 1    | 55 ± 1                 | -10 ± 1                     | 11       |
| Male 1                          | -16 ± 1               | 8 ± 1    | 54 ± 2                 | -9 ± 1                      | 14       |
| Male 2                          | -14 ± 1               | 9 ± 1    | 57 ± 1                 | -9 ± 1                      | 10       |
| Female                          | -12 ± 1               | 7 ± 1    | 54 ± 2                 | -10 ± 1                     | 13       |

1028 Activation parameters were calculated by data fitting to Boltzmann functions. V<sub>50</sub> is the voltage for  
 1029 half-maximal activation, k is the slope factor and n the number of cells. One-way ANOVA followed by  
 1030 Dunnett's multiple comparisons test. Values are expressed as mean ± s.e.m. \*\*\*\*P < 0.0001.

1031

1032

1033 **Supplemental Table 6.** Biophysical parameters of iPSC-CMs, Control 1 vs Control 2

| <b>Activation</b>               |                       |          |                        |                             |          |
|---------------------------------|-----------------------|----------|------------------------|-----------------------------|----------|
|                                 | <b>V<sub>50</sub></b> | <b>k</b> | <b>V<sub>rev</sub></b> | <b>Peak current density</b> | <b>n</b> |
| <b>Na<sup>+</sup> currents</b>  | mV                    | mV       | mV                     | pA/pF                       |          |
| Control 1                       | -29 ± 1               | 3 ± 1    | 17 ± 1                 | -27 ± 1*                    | 14       |
| Control 2                       | -34 ± 1               | 4 ± 1    | 15 ± 1                 | -38 ± 1                     | 15       |
| <b>Ca<sup>2+</sup> currents</b> |                       |          |                        |                             |          |
| Control 1                       | - 8 ± 1               | 8 ± 1    | 54 ± 1                 | -10 ± 1                     | 9        |
| Control 2                       | -11 ± 1               | 8 ± 1    | 55 ± 2                 | -10 ± 1                     | 11       |

1034 Activation parameters were calculated by data fitting to Boltzmann functions. V<sub>50</sub> is the voltage for  
 1035 half-maximal activation, k is the slope factor and n the number of cells. One-way ANOVA followed by  
 1036 Dunnett's multiple comparisons test. Values are expressed as mean ± s.e.m. \*P < 0.05.

1037

1038

1039

1040

1041

1042

1043

1044

1045

1046 **Supplemental Table 7. Primers used in mRNA analysis**

|                             |                                                                                                  |
|-----------------------------|--------------------------------------------------------------------------------------------------|
| SCN5A (cDNA)                | 5' -GAGGACCTGGACCCCTTCTA-3' (forward primer)<br>5' -GCATGTTGAAGAGCGAGTGA-3' (reverse primer)     |
| CACNA1C (cDNA)              | 5' -AAGGCTACCTGGATTGGATCAC-3' (forward primer)<br>5' -GCCACGTTTTTCGGTGTGAC-3' (reverse primer)   |
| KCNJ2 (cDNA)                | 5' -TCCGTGACATCTGAAACCA-3' (forward primer)<br>5' -TCACGGCTGCCTTCCTCTT-3' (reverse primer)       |
| 18s internal control (cDNA) | 5' -AACTTTCGATGGTAGTCGCCGT-3' (forward primer)<br>5' -TCCTTGGATGTGGTAGCCGTTT-3' (reverse primer) |

1047

## **SUPPLEMENTAL METHODS**

### **1. Ethics statement**

We obtained skin biopsies from 2 hemizygous DMD patients, 1 heterozygous female, and a healthy patient after written informed consent in accordance with the Helsinki Committee for Experiments on Human Subjects at Sheba Medical Center, Ramat Gan, Israel (Approval number: 7603-09-SMC), and with IRB HUM00030934 approved by the University of Michigan Human IRB Committee. The use of iPS cells and iPSC-CMs was approved by the Human Pluripotent Stem Cell Research Oversight (HPSCRO, #1062) Committee of the University of Michigan and by the Spanish National Center for Cardiovascular Research (CNIC) Ethics Committee and the Regional Government of Madrid.

### **2. Generation of iPSCs**

Cell lines were generated using Sendai virus CytoTune-iPS 2.0 Sendai reprogramming kit (Thermo Fisher) for transfection of Yamanaka's factors: OCT4, KLF4, c-Myc, and SOX2, as described.<sup>1,2</sup> Subsequently, iPSCs were cultured on Matrigel (Corning)-coated 6-well plates with mTeSR1 medium (Stemcell Technologies) at 37°C with 5% CO<sub>2</sub>. iPSCs were passaged every 5 days at a ratio of 1:6 by mechanical dissociation using 1 mL/well of Versene solution (Invitrogen) following incubation at 37 °C for 7 min. DMD iPSCs were transported from Israel in dry ice to Michigan and to CNIC where they were differentiated to iPSC-CMs and used for the initial (Michigan) and syntrophin rescue (CNIC) studies. All iPSCs were tested for pluripotency before starting cardiomyocyte differentiation protocols. All of cells correlated well with the expression status of the pluripotency factors. Differentiation markers were also assessed.

### **3. Patient-specific iPSC-CMs monolayers: Differentiation into cardiomyocytes, adapted from <sup>3</sup>.**

iPSC-CMs were generated by directed differentiation, modulating Wnt/ $\beta$ -catenin signaling.<sup>4</sup> Briefly, iPSCs were cultured for 5–6 days on Matrigel-coated (Corning, 100  $\mu$ g/mL) 6-well plates in StemMACs iPSC Brew XF medium (Miltenyi Biotec). Then, iPSCs were dissociated using 1 mL/well Versene solution at 37°C for 7 min and reseeded as monolayers on Matrigel-coated 12-well plates at a density of  $8.5 \times 10^6$  cells/well in StemMACs iPSC Brew XF medium supplemented with 5  $\mu$ mol/L ROCK inhibitor (Miltenyi); medium was replaced every day. After 2 days, when monolayers reached 100% confluence, the medium was changed to RPMI supplemented with B27 minus insulin (Invitrogen) containing 10  $\mu$ mol/L CHIR99021; this day was labelled as day 1 of differentiation. On day 2, the medium was changed to RPMI supplemented with B27 minus insulin. On day 4, the medium was changed to RPMI supplemented with B27 minus insulin, containing 10  $\mu$ mol/L of IWP-4. On day 6, the medium was changed to RPMI supplemented with B27 minus insulin. Finally, from the 8<sup>th</sup> day onwards, the medium was changed to RPMI supplemented with B27 complete supplement, RPMI +B27 media (Invitrogen).

#### **4. Patient-specific iPSC-CMs monolayers: Post directed differentiation iPSC-CMs purification using MACs negative selection**

The directed differentiation method used here does not generate a completely pure iPSC-CM population. Hence, the following purification steps preceded any characterization or experiments. iPSC-CMs  $\geq 30$  days in culture were washed with DPBS (Gibco) and dissociated using 1 mL of 0.25% Trypsin/EDTA per well. Next, 2 mL of EB20 media was added per well of dissociated cells, each well was triturated and then transferred into a sterile 15-mL conical. The EB20 media was composed of: 80% DMEM/F12 (Gibco), 0.1 mM Non-Essential Amino Acids (Gibco), 1 mM L-Glutamine (Gibco), 0.1 mM  $\beta$ -mercaptoethanol (Gibco), 20% Fetal Bovine Serum (FBS, Corning), and 10  $\mu$ M Blebbistatin (Toronto Research Chemicals). Collected cells were centrifuged at 900 RPM for 5 min at 4°C. *Purification:*<sup>5, 6</sup> After removal of the supernatant, 6 mL of MACs Buffer was added followed by trituration. Cells were centrifuged again at 900 RPM for 5 min at 4°C. The supernatant was aspirated and 80  $\mu$ L of MACs Buffer was added to



resuspend the pellet. Then, 20  $\mu$ L of non-cardiomyocyte depletion cocktail (-Biotin conjugated) primary antibody was added, flicked 5 times to mix and incubated on ice for 5 min. After primary antibody incubation, 1 mL MACs Buffer was added, and cells were gently triturated followed by a 900 RPM spin for 5 min at 4°C. The excess primary antibody was aspirated and 80  $\mu$ L of MACs Buffer was used to resuspend the pellet. Next, it was mixed with 20  $\mu$ L of anti-Biotin magnetic microbeads (secondary antibody) and incubated on ice for 5 min. In the meantime, LS columns with 30  $\mu$ m separation filters were placed onto a Quadro MACS Separator magnet, 15-mL conical tubes were appropriately labeled and positioned under each column, and 3 mL of MACs Buffer was run through each column to prime for addition of cell suspension. After secondary antibody incubation, cells were mixed with 1 mL of MACs Buffer. Then, the cell suspension was added to the separating filter on top of the flowing column, followed by 3  $\times$  3 mL of cold MACs Buffer washes while continuously collecting the total flow through. The flow through or iPSC-CMs fraction was triturated and 1 mL of the total suspension was placed in a 1.5-mL Eppendorf tube to count the iPSC-CMs using a Millipore Scepter with Sensor tips (60  $\mu$ m), this 1 mL was added back to the iPSC-CMs suspension total. Next, the purified (98-99%) iPSC-CMs were centrifuged, the supernatant aspirated, and then resuspended in media for plating. *Plating.* The purified iPSC-CMs fractions were resuspended in EB20 media with 5  $\mu$ M of ROCK inhibitor to 200–300k cells/200–300  $\mu$ L volume and plated as monolayers on 22 mm  $\times$  22 mm cut Matrigel-coated (100  $\mu$ g/mL diluted in DMEM/F12 media) PDMS. The plate was transferred to the incubator at 37°C and 5% CO<sub>2</sub> for 2 hours. Next, 3 mL of EB20/ROCK inhibitor media was added to each well. After 2 days, iPSC-CMs were washed with 3 mL DPBS with Ca<sup>2+</sup> and Mg<sup>2+</sup> (Gibco) followed by addition of 3 mL of RPMI +B27 media; media was changed every 3 days. The highly purified iPSC-CMs were in monolayer culture on Matrigel-PDMS for at least 7 days after plating to induce maturation. Then monolayers were dissociated with 0.25% Trypsin/EDTA and re-plated onto Matrigel-coated micropatterned PDMS. All iPSC-CM selection materials were purchased from Miltenyi Biotec, except for culture media which was mixed in the laboratory. All the tests carried out in this study were performed using at least 3 separate cardiomyocyte differentiations.

## 5. Micropatterning on PDMS (adapted from ref<sup>7</sup>).

Micropatterned area was 1 cm × 1 cm total, each island was 100 μm length × 15 μm width and islands were spaced 80 μm from each other. *Preparing PDMS stamps.* The surface of stamps was cleaned with scotch tape followed by sonication in 70% ethanol/milli-Q water for at least 20 min. In a sterile hood, they were allowed to dry and then, incubated with 250 μL Matrigel (100 μg/mL) diluted in water at room temperature for at least 1 h. *Preparing PDMS substrates in 6-well plates.* 18 mm PDMS circles were sonicated in 70% ethanol for 20 min and transferred to a 6-well plate after shaking excess EtOH off. When ready for microprinting, the culture dish was UVO treated with the lid off for 9 min. *Microprinting.* While UVO is performed on PDMS circles, the Matrigel solution from the PDMS stamps was aspirated. After UVO was completed, dried stamps were inverted onto each PDMS circle and removed one by one after ~2 min. Later, the micropatterned PDMS plate was incubated with pluronic-F127 overnight at room temperature. *Single cell re-plating.* Before re-plating iPSC-CMs, micropattern plates were cleaned with 3× PSA (Penicillin-Streptomycin-Amphotericin B solution; Thermo Scientific) diluted in PBS (Gibco) for 1 h, and exposed to UV light for 15 min. iPSC-CMs were dissociated from monolayers using trypsin 0.25% with EDTA for 8–10 min and adding RPMI media containing 10% FBS after dissociation. Next, dissociated iPSC-CMs were transferred through a 70 μm filter into a 50-mL conical tube. The iPSC-CM suspension was centrifuged at 700 RPM for 3 min. Subsequently, iPSC-CMs were re-suspended in warm RPMI/B27+ (with insulin) media supplemented with 2% FBS and 5 μM ROCK inhibitor (re-plating media). Finally, ~30k iPSC-CMs in 350 μL re-plating media were placed in the center of the micropatterned area. After ~5 h, 2 mL of re-plating media was added very gently. Plate was returned to the incubator and media change was performed at days 1 and 3 after re-plating. iPSC-CMs were on micropatterns at least 4 days prior to patch-clamping experiments.

## 6. Electrophysiology

Standard patch-clamp recording techniques were used to measure action potentials,  $I_{Na}$ ,  $I_{CaL}$ , and  $I_{K1}$ <sup>3, 8</sup>. All the experiments were performed at room temperature (22°C–25°C), except for the AP that were recorded at 37°C.

Voltage-clamp experiments were controlled with a Multiclamp 700B amplifier and a Digidata 1440A acquisition system (Molecular Devices). Data were filtered at 5 kHz and sampled at 5–20 kHz. Activation curve data were fitted to a Boltzmann equation, of the form  $g = g_{max} / (1 + \exp((V_{50} - V_m) / k))$ , where  $g$  is the conductance,  $g_{max}$  the maximum conductance,  $V_m$  is the membrane potential,  $V_{50}$  is the voltage at which half of the channels are activated, and  $k$  is the slope factor.

Pipettes were formed from aluminosilicate glass (AF150-100-10; Science Products) with a P-97 horizontal puller (Sutter Instruments), and had resistances between 2 and 3 M $\Omega$  for patch-clamp experiments and 5–7 M $\Omega$  for current-clamp recordings when filled with the respective pipette solutions (see below).

*Action potential recordings.* APs were elicited at 1 and 2 Hz in current-clamp mode using a programmable digital stimulator. The iPSC-CMs were bathed in 148 mM NaCl, 0.4 mM NaH<sub>2</sub>PO<sub>4</sub>, 1 mM MgCl<sub>2</sub>, 5.4 mM KCl, 1.8 mM CaCl<sub>2</sub>, 15 mM HEPES, and 5.5 mM glucose, pH = 7.4 adjusted with NaOH. The pipette solution contained 150 mM KCl, 1 mM MgCl<sub>2</sub>, 1 mM EGTA, 5 mM HEPES, 5 mM phosphocreatine, 4.4 mM K<sub>2</sub>ATP, and 2 mM  $\beta$ -hydroxybutyric acid, pH = 7.2 adjusted with KOH. Action potential properties including, maximum diastolic potential, overshoot, action potential amplitude and action potential duration were analyzed using custom-made software developed by Krzysztof Grzeda for the Center of Arrhythmia Research, University of Michigan. Maximum upstroke velocity was estimated using OriginPro 9 (OriginLab Corporation). For current clamp experiments, we selected control iPSC-CMs with ventricular-like action potentials showing a rectangular configuration, upstroke velocities ( $dV/dt_{max}$ )  $\geq 40$  V/s and amplitudes of 100 mV in the controls. Cells with a triangulated action potential (i.e., atrial-like), depolarized MDP and steep phase-4 depolarization (node-like) were discarded. All iPSC-CMs

selected for patch clamping were quiescent and required external stimulation to generate action potentials.

*Single currents.* For  $I_{Na}$ , we used a pulse protocol from -80 mV to +55 mV with a holding potential of -160 mV. Recordings were made in a bath solution that consisted of 10 mM NaCl, 1 mM MgCl<sub>2</sub>, 0.1 mM CdCl<sub>2</sub>, 20mM HEPES, 11 mM Glucose, 60 mM CsCl, and 72.5 mM Choline chloride, pH = 7.35 adjusted with CsOH. The pipette solution contained 60 mM CsF, 5 mM NaCl, 10 mM EGTA, 5 mM HEPES, 5 mM MgATP, and 75 mM Choline chloride, pH = 7.2 adjusted with CsOH.

$I_{K1}$  was elicited from a holding potential of -50 mV by 500-ms steps from -120 to +40 mV. The external recording solution contained 148 mM NaCl, 0.4 mM NaH<sub>2</sub>PO<sub>4</sub>, 1 mM MgCl<sub>2</sub>, 5.5 mM Glucose, 1.8 mM CaCl<sub>2</sub>, 5.4 mM KCl, 15 mM HEPES, and 5 μM Nifedipine, pH = 7.4 adjusted with NaOH. 1 mM BaCl<sub>2</sub> was used to isolate  $I_{K1}$  from other background currents (subtract solution). The internal solution contained 1 mM MgCl<sub>2</sub>, 5 mM EGTA, 140 mM KCl, 5 mM HEPES, 5 mM Phosphocreatine, 4.4 mM K<sub>2</sub>ATP, and 2 mM β-Hydroxybutyric acid, pH = 7.2 adjusted with KOH.

$I_{CaL}$  was evoked applying a voltage-step protocol from -40 mV to +80 mV with a holding potential of -50 mV. The iPSC-CMs were bathed in 137 mM TEA-Cl, 5.4 mM CsCl, 1 mM MgCl<sub>2</sub>, 1.8 mM CaCl<sub>2</sub>, 4 mM Aminopyridine, 10 mM HEPES, 30 μM TTX, and 11 mM Glucose, pH = 7.4 adjusted with CsOH. The pipette solution contained 20 mM TEA-Cl, 120 mM CsCl, 1 mM MgCl<sub>2</sub>·6H<sub>2</sub>O, 5.2 mM Mg-ATP, 10 mM HEPES, and 10 mM EGTA, pH = 7.2 adjusted with CsOH.

Chemicals were purchased from Sigma. Data analysis was performed using pClamp 10.2 software package (Axon Instruments).

## 7. RT-PCR

For quantitative evaluation of the steady-state mRNA expression in iPSC-CM cultures, total RNA was prepared using the RNeasy Mini Kit (Qiagen), including DNase treatment. 300 ng of RNA were reversed transcribed and converted to cDNA with oligo(dT)15 primers using reverse transcriptase according to manufacturer's specifications, SuperScript III First-Strand Synthesis System (Invitrogen). Quantitative PCR was performed using Sybergreen Master Mix (Applied Biosystems) in the presence of sense- and antisense-primers (10  $\mu$ M) for *SCN5A*, *CACNA1C* and *KCNJ2*, as described previously (Table S3).<sup>9</sup> The PCR condition consisted of 95°C for 5 min, followed by 40 cycles of 95°C for 15 secs and 60°C for 1 min, followed by melting-curve analysis to verify the correctness of the amplicon.

The samples were analyzed in biological triplicates using the primers listed in supplemental table 1 and run in a StepOnePlus Real-Time PCR system (Applied Biosystems). The expression of the mRNA of the gene of interest relative to the internal control 18s rRNA in samples from control, hemizygous and heterozygous iPSC-CMs was calculated by the  $\Delta\Delta$ CT method, based on the threshold cycle (CT), as fold change =  $2^{-(\Delta\Delta$ CT)}, where  $\Delta$ CT = CT<sub>gene of interest</sub> - CT<sub>18S</sub> and  $\Delta\Delta$ CT =  $\Delta$ CT<sub>hemizygous/heterozygous iPSC-CMs</sub> -  $\Delta$ CT<sub>control iPSC-CMs</sub><sup>10</sup>. From each experiment, the cDNA of 3 cell culture wells were measured as biological replicates of each cell line. Each cell culture well was measured from at least 3 separate cardiomyocyte differentiation cultures as technical replicates.

### **8. Wester Blotting: Cell surface protein biotinylation/Western Blot**

iPSC-CMs were plated as above, and membrane proteins were biotinylated. iPSC-CMs monolayers were washed twice with ice cold PBS and biotinylated for 1 h at 4°C using PBS containing 1.5 mg of EZ Link Sulfo-NHS-SS-Biotin (Thermo Scientific). Next, each monolayer was washed 3x with PBS before and after 10 min/4°C incubation with PBS/100 mM Glycine (to quench unlinked biotin). Finally, iPSC-CMs were lysed for 1 h at 4°C with lysis buffer containing (in mM, pH = 7.4): 150 NaCl, 25 Tris, 1% Triton X, and 1% Sodium deoxycholate, supplemented with protease inhibitors consisting of 1  $\mu$ g/mL Benzamidine, 2  $\mu$ g/mL Leupeptin, and 2  $\mu$ g/mL Pepstatin A.

## 9. Wester Blotting: Protein precipitation

Pull-down experiments were conducted overnight at 4°C with 30 µg of biotinylated protein dissolved in 100 µL of lysis buffer and 30 µL of Pierce Streptavidin magnetic beads (Thermo Scientific). Next day, magnetic beads were washed three times with lysis buffer, and the first supernatant was collected. 25 µL of 4× loading buffer were then added to the magnetic beads. Before loading samples into the gel, they were heated at 50°C for 5 min.

## 10. SDS/PAGE and immunoblotting

Proteins were resolved in 4–20% SDS-PAGE gels and transferred to iBlot® stacks with regular PVDF membranes using the Life Technologies iBlot2 system. Nonspecific binding sites were blocked with 5% albumin in PBS-T (in mM, 3 KH<sub>2</sub>PO<sub>4</sub>, 10 Na<sub>2</sub>HPO<sub>4</sub>, 150 NaCl, and 0.1% Tween 20, pH = 7.2–7.4) for 30 min at room temperature. Membranes were probed with the anti-human Nav1.5 or Kir2.1 antibody diluted in 5% albumin/PBS-T overnight at 4°C. After washing 3×/10 min, membranes were incubated for 1 h with a secondary horseradish peroxidase-conjugated antibody diluted in 5% albumin/PBS-T. Subsequently, membranes were washed 3×/10 min with PBS-T. Signals were detected with the SuperSignal West Pico Chemiluminescent substrate (Thermo Scientific). Expression of Nav1.5 and Kir2.1 was quantified using Image Lab software (Bio-Rad).

Primary antibodies were prepared in block solution. Mouse anti-Cardiac Troponin T antibody (1:1000, #Ab10214, Abcam) was used to identify cTnT as the marker for cardiomyocytes. Rabbit anti-Nav1.5 antibody (clone ASC-013, Alomone Labs) was used for Nav1.5 protein expression (1:500), mouse anti-Kir2.1 antibody (clone N112B/14, University of California at Davis/Nacional Institutes of Health 105 NeuroMab Facility) was used for Kir2.1 protein expression (1:500), mouse anti-Dystrophin (1:000, #D8043, Sigma) was used to detect the Dp427 dystrophin isoform. Mouse anti-Actinin antibody (1:1000, #A7811, Sigma) was used to detect Actinin, loading control in total protein analysis. A mouse antibody (#Ab7671, Abcam) was used to detect the Na-KATPase, positive control for biotinylation assays. Rabbit anti-Connexin antibody (1:1000, #C6219,



Sigma) was used to detect Connexin 43. HRP-conjugated secondary antibodies (mouse HRP #115-035-146 and rabbit HRP #111-035-144) were obtained from Jackson ImmunoResearch Laboratories for Western blot analysis.

## **11. Immunofluorescence**

iPSC-CMs were seeded on micropatterned Matrigel-coated 6-well plates and fixed with 2% paraformaldehyde/PBS for 15 min. Cells were incubated for 10 min at a 1:100 dilution of wheat germ agglutinin (WGA) Alexa 488 (ThermoScientific), washed with PBS, and re-fixed in 4% formaldehyde in PBS at RT. Then, hiPSC-CMs were washed 5 min with PBS and blocked with block solution (PBS + 5% BSA + 0.4% Triton X) for 1 h. Incubation with primary antibodies was done in block solution for 1.5 h in a humidity chamber. To washout the excess of primary antibody, hiPSC-CMs were washed 3x/5min with PBS. Next, secondary antibodies in block solution were added to each slip and incubated for 1 h in a humidity chamber at room temperature. hiPSC-CMs were kept in dark, washed with PBS 3x/5 min, and mounted with PermaFluor Aqueous (Thermo Fisher) and coverslip.

Primary antibodies were used at different dilutions in block solution: Troponin I (#MAB1691, Millipore) was used at 1:500, Kir2.1 (#APC-026, Alomone) antibody was used at 1:200, Nav1.5 (#AGP-008, Alomone) was used at 1:200, Dystrophin MANDRA1 (#D8043, Sigma) was used at 1:100, and Phalloidin 488 (#A12379, Invitrogen) at 1:500 (it comes with a fluorophore conjugated so no secondary Ab incubation was needed, stains F-actin). Secondary Ab for cTnI was Cy3 Goat anti-Mouse IgG (1:400, #115-167-003, Jackson Immuno Research), for anti-dystrophin MANDRA1, the Cy3 Rat anti-mouse IgG (1:200, #415-165-166, Jackson ImmunoResearch) was used, for Kir2.1 was used Alexa Fluor 568 Goat Anti Rabbit IgG (H+L) (Invitrogen, 1:500) and for Nav1.5 was used Alexa Fluor 680 Goat Anti Guinea Pig IgG (H+L) (Invitrogen, 1:500). Both secondary Abs were diluted in block solution containing 1:10,000 DAPI (#D9542, Sigma) stain dilution. Immunostained preparations were analyzed by confocal microscopy, using a Nikon A1R confocal microscope 102 (Nikon Instruments Inc) Leica SP8 confocal microscope (Leica Microsystems) to determine protein localization.

## 12. Optical Mapping

iPSC-CMs were plated as monolayers at a density of ~50k iPSC-CMs in RPMI/B27+ media. After 7 days in culture, media was removed and each iPSC-CMs monolayer was washed with Hank's balanced salt solution with Ca<sup>2+</sup> and Mg<sup>2+</sup> added (HBSS<sup>++</sup>, Thermo Scientific) to remove remaining media. Next, iPSC-CMs were incubated with the FluoVolt membrane potential probe (F10488; Thermo Scientific) diluted in HBSS<sup>++</sup>, as reported before <sup>11</sup>. After a 30-minute incubation time, iPSC-CMs were washed with HBSS<sup>++</sup> and then heated at 35°C before optical mapping recordings. All iPSC-CMs monolayers displayed pacemaker activity, and the spontaneous and paced APs were recorded using a charge-coupled device camera (200 fps, 80 × 80 pixels; Red-Shirt Little Joe) with the appropriate emission filters and light-emitting diode illumination <sup>12</sup>. The recorded videos were filtered in both the time and the space domain, and CV was measured as described previously <sup>3, 13</sup>.

## 13. Generation and Stable Transfection of *SNTA1-IRES-GFP* using PiggyBac Transposon Integration Methods

Non-viral piggy-bac vector (1 µg) encoding SNTA1-IRES-GFP were co-transfected with mouse transposase-expression vector (250 ng) by electroporation (Amaxa® 4D-Nucleofector, Lonza) into iPSCs cells (~1.10<sup>6</sup> cells/electroporation). After 3-5 days GFP positive cells were selected by FACS sorter (BD FACSAria Cell Sorter, BD BioSciences) and grow-up. Every week, until three times, fluorescence was confirmed, and cells sorted to confirm cDNA stable integration into the cells. After that, iPSC-CMs differentiation protocol was applied as stated above.

## 14. Statistics

Statistical analyses were performed with Prism 8 (GraphPad Software). Values were first tested for normality (Shapiro-Wilk test) before statistical evaluation. Nonparametric Mann-Whitney rank test (two-tailed) was used. Multiple comparisons were analyzed using

two-way analysis of variance (ANOVA) followed by Sidak's test. All data are shown as mean  $\pm$  s.e.m.  $P < 0.05$  (2-tailed) was considered significant. Unless stated otherwise, the number  $n$  of observations indicated reflects the number of iPSC-CMs recorded from each cell line from at least 3 differentiations.

**Supplemental video 1.** Focal discharges in Female iPSC-CMs monolayer.

**Supplemental video 2.** Local conduction block in Female iPSC-CMs monolayer.

## References

1. Eisen B, Ben Jehuda R, Cuttitta AJ, Mekies LN, Reiter I, Ramchandren S, Arad M, Michele DE and Binah O. Generation of Duchenne muscular dystrophy patient-specific induced pluripotent stem cell line lacking exons 45-50 of the dystrophin gene (IITi001-A). *Stem Cell Res.* 2018;29:111-114.
2. Eisen B, Ben Jehuda R, Cuttitta AJ, Mekies LN, Shemer Y, Baskin P, Reiter I, Willi L, Freimark D, Gherghiceanu M, Monserrat L, Scherr M, Hilfiker-Kleiner D, Arad M, Michele DE and Binah O. Electrophysiological abnormalities in induced pluripotent stem cell-derived cardiomyocytes generated from Duchenne muscular dystrophy patients. *J Cell Mol Med.* 2019;23:2125-2135.
3. Herron TJ, Rocha AM, Campbell KF, Ponce-Balbuena D, Willis BC, Guerrero-Serna G, Liu Q, Klos M, Musa H, Zarzoso M, Bizy A, Furness J, Anumonwo J, Mironov S and Jalife J. Extracellular Matrix-Mediated Maturation of Human Pluripotent Stem Cell-Derived Cardiac Monolayer Structure and Electrophysiological Function. *Circ Arrhythm Electrophysiol.* 2016;9:e003638.
4. Lian X, Zhang J, Azarin SM, Zhu K, Hazeltine LB, Bao X, Hsiao C, Kamp TJ and Palecek SP. Directed cardiomyocyte differentiation from human pluripotent stem cells by modulating Wnt/beta-catenin signaling under fully defined conditions. *Nat Protoc.* 2013;8:162-75.
5. Pekkanen-Mattila M, Hakli M, Polonen RP, Mansikkala T, Junnila A, Talvitie E, Koivisto JT, Kellomaki M and Aalto-Setälä K. Polyethylene Terephthalate Textiles Enhance the Structural Maturation of Human Induced Pluripotent Stem Cell-Derived Cardiomyocytes. *Materials (Basel).* 2019;12.
6. Herron T, Monteiro da Rocha A and Campbell K. Cardiomyocyte purification from pluripotent stem cells. 2017.
7. Kuo PL, Lee H, Bray MA, Geisse NA, Huang YT, Adams WJ, Sheehy SP and Parker KK. Myocyte shape regulates lateral registry of sarcomeres and contractility. *Am J Pathol.* 2012;181:2030-7.
8. Caballero R, Utrilla RG, Amoros I, Matamoros M, Perez-Hernandez M, Tinaquero D, Alfayate S, Nieto-Marin P, Guerrero-Serna G, Liu QH, Ramos-Mondragon R, Ponce-Balbuena D, Herron T, Campbell KF, Filgueiras-Rama D, Peinado R, Lopez-Sendon JL, Jalife J, Delpon E and Tamargo J. Tbx20 controls the expression of the KCNH2 gene and of hERG channels. *Proceedings of the National Academy of Sciences of the United States of America.* 2017;114:E416-E425.
9. Bizy A, Guerrero-Serna G, Hu B, Ponce-Balbuena D, Willis BC, Zarzoso M, Ramirez RJ, Sener MF, Mundada LV, Klos M, Devaney EJ, Vikstrom KL, Herron TJ and Jalife J. Myosin light chain 2-based selection of human iPSC-derived early ventricular cardiac myocytes. *Stem Cell Res.* 2013;11:1335-47.
10. Schmittgen TD and Livak KJ. Analyzing real-time PCR data by the comparative C(T) method. *Nat Protoc.* 2008;3:1101-8.
11. da Rocha AM, Campbell K, Mironov S, Jiang J, Mundada L, Guerrero-Serna G, Jalife J and Herron TJ. hiPSC-CM Monolayer Maturation State Determines Drug Responsiveness in High Throughput Pro-Arrhythmia Screen. *Sci Rep.* 2017;7:13834.

12. Lee P, Bollensdorff C, Quinn TA, Wuskell JP, Loew LM and Kohl P. Single-sensor system for spatially resolved, continuous, and multiparametric optical mapping of cardiac tissue. *Heart Rhythm*. 2011;8:1482-91.
13. Campbell K, Calvo CJ, Mironov S, Herron T, Berenfeld O and Jalife J. Spatial gradients in action potential duration created by regional magnetofection of hERG are a substrate for wavebreak and turbulent propagation in cardiomyocyte monolayers. *The Journal of physiology*. 2012;590:6363-79.
